# Supplementary material for: Revision of the Subgenus Ochthomantis Frogs from Madagascar (Amphibia: Mantellidae) with the Description of Four Species and Resurrection of Mantidactylus catalai and M. poissoni
Source: MDPI journal article supplement (doi:10.3390/ani13172800), 2023-09-03
Supplement: s1 [file s1]

**Table S13.** Species collecting localities. \*: Specimens with molecular data

| Species                        | Elevation<br>range (m) | Observation sites                              | Geographic<br>position     | Specimens                                            |
|--------------------------------|------------------------|------------------------------------------------|----------------------------|------------------------------------------------------|
| <i>Mantidactylus femoralis</i> | 350–1300               | Ampanasana Ankolony–Beambihy<br>river Marojejy | 14°26.2'S<br>49°46.5'E     | AMNH A157112, UADBA 7778                             |
|                                | 700                    | Manantenina river Marojezy                     | 14°26'S 49°46'E            | UMMZ 212835, UADBA 3720                              |
|                                | 1400                   | Analapakila                                    | 14°26.233'S<br>48°36.696'E | AMNH A167521*                                        |
|                                | 800                    | Antsahatelo                                    | 13°51.588'S<br>48°51.979'E | AMNH A 167580*                                       |
|                                | 750                    | Ramena                                         | 13°55.071'S<br>48°53.179'E | AMNH A 167581*                                       |
|                                | 1000                   | Les Rousettes                                  | 12°31'S 49°10'E            | UADBA 9049, 9052, 9054, 9086–9087                    |
|                                | –                      | Moramanga                                      | –                          | AMNH A23781, AMNH A50336                             |
|                                | 420                    | Namarafana Zahamena                            | 17°44'S 48°58.5'E          | UADBA 26267                                          |
|                                | 850                    | Volontsagana Zahamena                          | 17°42'S 48°46'E            | UADBA 26375, 26379, 26399                            |
|                                | 1150                   | Rangovalo Zahamena                             | 17°40.5'S<br>48°45.5'E     | UADBA 26378; UADBA 26253–26254, 26374, 26398         |
|                                | 250–450                | Betampona Reserve                              | 17°55.866'S<br>49°12.190'E | AMNH A174627*, UADBA 26250–26251, 26263–26265, 26402 |
|                                | 450                    | Sandranantitra                                 | 18°2.9'S 49°5.5'E          | UADBA 12306, 12308                                   |
|                                | 950                    | Didy                                           | 18°11.858'S<br>48°34.728'E | UADBA 7278, 11886                                    |
|                                | 600–1100               | Mangerivola                                    | 18°11.5' S<br>48°55.01'E   | UADBA 19691, UADBA 19693–19694                       |
|                                | 1 580                  | Ambohitantely                                  | 18°11.158'S<br>47°16.757'E | UADBA 26282; 26400, 39003                            |
|                                | 730–950                | Andranomangoboka                               | 18°14.787'S<br>45°21.419'E | UADBA 26255, 26380                                   |
|                                | 1 200                  | Doany                                          | 18°17.297'S<br>45°33.289'E | UADBA 26281, 26376                                   |
|                                | 1 250                  | Andriankely                                    | 18°25.225'S<br>47°56.245'E | UADBA 20478–20479                                    |

|           |                                |                              |                                          |
|-----------|--------------------------------|------------------------------|------------------------------------------|
| 1 300     | Andranomay                     | 18°28.8'S<br>47°57.3'E       | UADBA 26363                              |
| 850       | Sahanomanana                   | 18°32'S 48°26'E              | UADBA 7515–7516                          |
| 530       | Andriatantely                  | 18°41.724'S<br>48°48.769'E   | UADBA 11974–11976                        |
| 895       | Sahaberiana                    | 18°47.503'S<br>48°25.572'E   | UADBA 11890                              |
| 870–1050  | Andranomanaponga               | 18°49.750'S<br>48°25.9'E     | UADBA19663–19665                         |
| 980       | Analamay Ambatovy              | 18°49.715'S<br>48°19.960'E   | UADBA 9251–9252, 9254                    |
| 950       | Mantadia Analamazaotra         | 18°56'S 48°24'E              | UADBA 7241, 11887                        |
| 1335      | Mandraka                       | 18°57.733'S<br>47°55.05'E    | UADBA RAX10955*                          |
| 950       | Manasamena                     | 19°02.637'S<br>48°20.910'E   | AMNH A174646*, UADBA 26266, 26385        |
| 1025      | Ampanatovana                   | 19°02.637'S<br>48°20.912'E   | UADBA 26118, 26268, 26269–26270          |
| 950–1000  | Ankeniheny                     | 19°05.850'S<br>48°19.850'E   | UADBA 6280–6281                          |
| 950       | Tsinjoarivo                    | 19°25' S 47°25' E            | UADBA 8525, 8527, 9046, 26395–26396      |
| 850       | Ambohibehivavy Vasiona         | 19°41.387' S<br>46°62.853' E | AMNH A174654*                            |
| 1 600     | Ambatomenaloha Itremo          | 20°37.130'S<br>46°33.347'E   | AMNH A187128*                            |
| 1000      | Vohidratiana                   | 21°0.117'S<br>47°33.500'E    | UADBA 19696                              |
| 1150–1420 | Ankafina Tsarafidy             | 21°12.598'S<br>47°12.874'E   | AMNH A174623*, UADBA 26249, 26262, 26389 |
| 1 210     | Volontsagana river Andringitra | 21°12.598'S<br>47°12.874'E   | UADBA 26379, 26403                       |
| 810       | Sahavatoy River Andringitra    | 22°13.667'S<br>47°0.217'E    | UADBA 26252                              |

---

|                                 |           |                                         |                            |                                                |
|---------------------------------|-----------|-----------------------------------------|----------------------------|------------------------------------------------|
|                                 | 150       | Kianjavato                              | 21°23.950S<br>47°52.367E   | AMNH A174651*                                  |
|                                 | 600       | Ambohimananana Tolongoina               | 21°28.557'S<br>47°33.759'E | UADBA 26257, 26377, 26397                      |
|                                 | 700       | Sahamalio                               | 22°26.315'S<br>45°15.648'E | UADBA 26258, 26283                             |
|                                 | 600       | Canyon Singe                            | 22°29.138'S<br>45°23.086'E | UADBA 26259, 26260–26261, 26284, 26401         |
|                                 | 650       | Ranohira                                | 22°32' S 45°21' E          | UADBA 6878                                     |
|                                 | 1300–1400 | Amorimbato                              | 23°27.44'S<br>46°20.02'E   | UADBA 9772–9776, 9778                          |
|                                 | 820–840   | Ambinany                                | 24°35.6'S<br>46°44.3'E     | UADBA 4519                                     |
|                                 | 90        | Manantantely                            | 24°59'S<br>46°55.917'E     | UMMZ 197651*, UADBA 1409–1415, 1417–1418, 7517 |
|                                 | 520       | Beampingaratsy Pass                     | 24°28.244'S<br>46°53.525'E | AMNH A181735*                                  |
|                                 | 800–950   | Ampasimekieny Pass                      | 24°32'S 46°51'E            | UADBA 1422                                     |
|                                 | 500       | 8 km Northwest Eminiminy/<br>Andohahela | 24°37.55'S<br>46°45.92'E   | UADBA 4515, 4517–4518, 4520                    |
| <i>Mantidactylus ambreensis</i> | 1000      | Les Roussettes                          | 12°31'S 49°10'E            | UADBA 9056–9057                                |
|                                 | 650–1150  | Atomboka river                          | 12°32.3'S 49°10'S          | UMMZ 212426*, 212435*, UADBA 3714              |
|                                 | 200       | Benavony                                | 13°40'S 48°28'E            | UADBA 7222–7224                                |
|                                 | 450–650   | Mandrizavona                            | 13°48.043'S<br>48°44.78'E  | AMNH A167482*, UADBA 8397, 8413                |
|                                 | 550–750   | Besahona                                | 13°54.372'S<br>48°52.425'E | AMNH A167485, UADBA 8394, 8411, 8416           |
|                                 | 730–750   | Ramena                                  | 13°55.071'S<br>48°53.179'E | UADBA 8393, 8396, 8414                         |
|                                 | 1150      | Antsaravy                               | 13°55.560'S<br>48°54.353'E | AMNH A167499–167500, 167565*, UADBA 8408, 8410 |
|                                 | 700       | Antsahatelo                             | 13°51.588'S<br>48°51.979'E | AMNH A167486, UADBA 8401                       |

|                                |          |                                                     |                               |                                                                                             |
|--------------------------------|----------|-----------------------------------------------------|-------------------------------|---------------------------------------------------------------------------------------------|
|                                | 760      | Nirhy's cascade Camp                                | 13°51.023'S<br>48°47.902'E    | UADBA 8395, 8398, 8412, 8415                                                                |
|                                | 550      | Betaindambo                                         | 13°51.932'S<br>48°49.189'E    | UADBA 8399                                                                                  |
|                                | 350      | Analalava                                           | 14°35'S 47°42'E               | AMNH A50521                                                                                 |
|                                | 900–1000 | Irony                                               | 14°44.937'S<br>48°29.449'E    | AMNH A167501*–167504, UADBA 5647–50, 26120, 26222–<br>26224, 26271–26272                    |
|                                | 330      | Ambohibola                                          | 16°38.358'S<br>47°26.165'E    | AMNH A174618*                                                                               |
| <i>Mantidactylus ambony</i>    | 1000     | Les Roussetes                                       | 12°31'S 49°10'E               | UADBA 7225–7226, UADBA 9058                                                                 |
|                                | 730–750  | Ramena                                              | 13°55.071'S<br>48°53.179'E.   | AMNH A167490–167495, 167497, UADBA 8406                                                     |
|                                | 700      | Antsahatelo                                         | 13°51.588' S<br>48°51.979' E. | AMNH A167487                                                                                |
|                                | 1150     | Antsaravy                                           | 13°55.560'S<br>48°54.353'E.   | AMNH A167498                                                                                |
|                                | 350 m    | 34 km South from Maevatanana                        | 17°09.092'S<br>46°51.365'E.   | UADBA 5726                                                                                  |
| <i>Mantidactylus mocquardi</i> | 400–670  | Salafaina                                           | 13°25.405'S<br>49°41.617'E    | UADBA 19916                                                                                 |
|                                | 350–530  | Bezavona                                            | 13°31.962'S<br>49°51.954'E    | AMNH A167583, 167585, 167587*, 167584, 167586, UADBA<br>19597, 19600●02, 19650, 19652–19653 |
|                                | 970–1300 | Sorata                                              | 13°41.147'S<br>49°26.511'E    | AMNH 167589, 167597, UADBA19603–19605, 19640                                                |
|                                | 620–650  | Ankitsika                                           | 13°52.343'S<br>49°47.045'E    | AMNH A167588, 174622*, UADBA 19654–19655                                                    |
|                                | 250      | Ambalafary                                          | 14°04'S 48°17'E               | UMMZ 21235                                                                                  |
|                                | 700–1300 | Andampimbazaha cascade or<br>Andasimbazaha Marojejy | 14°26.05'S<br>49°45.7'E       | AMNH 157114, 157116–157120, UADBA 7774, 7777                                                |
|                                | 390      | Ampanasantongotra Marojejy                          | 14°26.2'S<br>49°46.5'E        | UADBA 7765–7767, 7769, 7772–7773                                                            |
|                                | 650–700  | Manantenina river Marojezy                          | 14°26'S 49°46'E               | UMMZ 212824*, UADBA 3717, 3719                                                              |
|                                | 1300     | Ampanasana Ankolony Marojejy                        | 14°26.2'S<br>49°46.5'E        | AMNH A157111, 157113                                                                        |

|           |                           |                            |                                                                                                                            |
|-----------|---------------------------|----------------------------|----------------------------------------------------------------------------------------------------------------------------|
| 810–980   | Ambolokopatrika Betaolana | 14°32.302'S<br>49°26.243'E | AMNH A174621*, PBZT 6641, 6659, 6836, 7042,<br>PBZT/FN6639, UADBA 19596, 19606, 19609–19610, 19646–<br>19647*, 26304–26305 |
| 600–900   | Andranomavohely           | 14°34.165'S<br>49°16.568'E | UADBA 19648–19649, 26234, 26302–26303                                                                                      |
| 1260–1550 | Anjanaharibe–Sud          | 14°44.7'S<br>49°27.7'E     | UADBA 8118–8119, 8121, 8123–8124                                                                                           |
| 785       | Tsararano                 | 14°54.667'S<br>49°41.383'E | PBZT FN6053–6054, 6057, 6110, 6212                                                                                         |
| 525       | Ilampy                    | 15°23.5'S<br>50°02.783'E   | PBZT FAZC10107–10108                                                                                                       |
| 620       | Ambatolaidama             | 15°18.33'S<br>50°01.24'E   | PBZT FN7761                                                                                                                |
| 650       | Ambohitsitondroina        | 15°26'S<br>49°57.34'E      | PBZT RJS342–314                                                                                                            |
| 100       | Ankavanana River          | 15°18.5'S 50°14'E          | UMMZ 212881*                                                                                                               |
| 50        | Ambodiriana               | 16°40.469'S<br>49°42.167'E | AMNH A174652*                                                                                                              |
| 600       | Ambatovaky                | 16°46.913'S<br>49°14.438'E | UADBA 17861, 19685                                                                                                         |
| 1150      | Rangovalo Zahamena        | 17°40.5'S<br>48°45.5'E     | UADBA 26235. 26240–26241, 26298                                                                                            |
| 850       | Volontsagana Zahamena     | 17°42'S 48°46'E            | UADBA 26225. 26228–26229, 26242                                                                                            |
| 340–460   | Betampona Reserve         | 17°54.858'S<br>49°12.474'E | AMNH A174628*, UADBA 26232–26233, 26236, 26238–<br>26239, 26273–26275. 26278–26279, 26285–26294, 26296–26297               |
| 450       | Sandranantitra            | 18°2.9'S 49°5.5'E          | UADBA 12307, 12310–12315                                                                                                   |
| 650–840   | Mangerivola               | 18°11.742'S<br>48°55.095'E | UADBA 17862, 19684, 19686–19690. 26300                                                                                     |
| 950       | Didy                      | 18°11.858'S<br>48°34.728'E | UADBA 10112–10119                                                                                                          |
| 900       | Iofa                      | 18°41'S 28°26'E            | UADBA 10070, 11889                                                                                                         |
| 980       | Analamay Ambatovy         | 18°49.715'S<br>48°19.960'E | UADBA 9253                                                                                                                 |
| 895–950   | Mantadia Analamazaotra    | 18°56'S 48°24'E            | UADBA 7312–14, UADBA 11891–11892                                                                                           |

|                                 |           |                                        |                            |                                                                 |
|---------------------------------|-----------|----------------------------------------|----------------------------|-----------------------------------------------------------------|
|                                 | 1025      | Ampanatovana Lakato                    | 19°02.637'S<br>48°20.912'E | UADBA 26111                                                     |
|                                 | 900       | Ankeniheny                             | 19°06'S<br>48°19.85'E      | UADBA 6282–6283                                                 |
|                                 | 870–1050  | Andranomanaponga                       | 18°49.750'S<br>48°25.9'E   | UADBA 19680–19681                                               |
| <i>Mantidactylus zolitschka</i> | 840       | An'ala                                 | 18°56'S 48°28'E            | UADBA 6965–6966, ZMK 60110, 60112–60116, ZSM 184/2003, 939/2000 |
| <i>Mantidactylus catalai</i>    | 720       | Iatara Andringitra                     | 22°13.333'S<br>47°01.483'E | UMMZ 212890*                                                    |
|                                 | 810–1240  | Sahavatoy/Volontsagana                 | 22°13.667'S<br>47°00.217'E | UADBA 26403–26405                                               |
|                                 | 900       | Southwest Ranomafana (Ifanadiana road) | –                          | AMNH 7881–7882 A133689–133690, 18019 A168364                    |
|                                 | 1150–1300 | Amorimbato                             | 23°27.44'S<br>46°20.02'E   | UADBA 9772–9774; 9782                                           |
|                                 | 800–950   | Ampasimekieny Pass                     | 24°32'S 46°51'E            | UADBA 1419–1421, 1423                                           |
|                                 | 520       | Beampingaratsy Pass                    | 24°28.244'S<br>46°53.525'E | AMNH A181732*, A181821*                                         |
|                                 | 990–1100  | Eminiminy                              | 24°35.04'S<br>46°44.08'E   | UADBA 4513–4514; 4516, 4521, 4523                               |
|                                 | 820       | Ambinany                               | 24°35.6'S<br>46°44.3'E     | UADBA 4522                                                      |
|                                 | 125       | Manatantely forest                     | 24°39'S<br>46°55.083'E     | UADBA 3706                                                      |
|                                 | 850       | Manangotry                             | 24°45'S 46°52'E            | UMMZ 197676                                                     |
|                                 | 20        | Sainte Luce                            | 24°45'S 47°11'E            | UMMZ 191515–19116                                               |
|                                 | –         | Isaka–Ivondro (next to Andohahela)     | –                          | MNHN 1935.153                                                   |
|                                 | 75–300    | Nahampoana                             | 24°58'S 46°58'E            | UMMZ 197662–19764                                               |
| <i>Mantidactylus poissoni</i>   | 600       | Ambatovaky                             | 16°46.910'S<br>49°14.417'E | UADBA 19786                                                     |
|                                 | 1150      | Rangovalo ridge                        | 17°40.5'S<br>48°45.5'E     | UADBA 26409                                                     |

|                                  |          |                              |                            |                                                            |
|----------------------------------|----------|------------------------------|----------------------------|------------------------------------------------------------|
|                                  | 895      | Sahaberiana                  | 18°47.503'S<br>48°25.572'E | UADBA 11899                                                |
|                                  | 1450     | Mandraka                     | 18°54.727'S<br>47°55.174'E | AMNH A174653*, MNHN 1937.1. UADBA 39000                    |
|                                  | 950      | Andasibe                     | 18°57'S 48°26'S            | UADBA 7125                                                 |
|                                  | 900      | Ankeniheny                   | 19°05.850'S<br>48°19.850'E | UADBA 6876                                                 |
|                                  | 950      | Manasamena                   | 19°02.637'S<br>48°20.910'E | UADBA 26411–26412, AMNH A174649–174650                     |
| <i>Mantidactylus danieli</i> nsp | 1150     | Atomboka river               | 12°32.3'S 49°10'S          | UMMZ 212827*, UADBA 3710–3713                              |
|                                  | 350–400  | Salafaina                    | 13°26.257'S<br>49°43.01'E  | AMNH A167590*, AMNH A167591–92, UADBA 19595,<br>26371      |
|                                  | 800      | Antsahatelo                  | 13°51.588'S<br>48°51.979'E | AMNH A167580                                               |
|                                  | 750      | Besahona                     | 13°54.372'S<br>48°52.425'E | AMNH A167177                                               |
|                                  | 750      | Ramena river                 | 13°55.071'S<br>48°53.179'E | AMNH A167582, UADBA 8382                                   |
|                                  | 760      | Nirhy's cascade Camp Analabe | 13°51.023'S<br>48°47.902'E | AMNH A167578–167579                                        |
|                                  | 850      | Andramanalana                | 14°24.400'S<br>49°20.217'E | AMNH A181773*                                              |
|                                  | 180–1200 | Bekolosy/Antsahabe River     | 14°02.5'S 48°18'E          | UADBA 3716, 12140, UMMZ 212836*                            |
|                                  | 250      | Ambalafary                   | 14°04'S 48°17'E            | UMMZ 212835                                                |
|                                  | 1580     | Matsaborimena Trois Lacs     | 14°19.859'S<br>48°35.240'E | AMNH A167517, UADBA 26359                                  |
|                                  | 1450     | Analapakila                  | 14°26.233'S<br>48°36.696'E | AMNH A167522, UADBA 26361                                  |
|                                  | 1300     | Ampanasana Ankolony Marojejy | 14°26.2'S<br>49°46.5'E     | AMNH A157111, 157113, UADBA 7765–7767, 7769, 7772–<br>7773 |
|                                  | 600      | Ampanasantongotra Marojejy   | 14°26.2'S<br>49°46.5'E     | UADBA 7770                                                 |
|                                  | 880–900  | Ambolokopatrika              | 14°32.302'S<br>49°26.243'E | UADBA 19593, 26113, 26359–60, 26362, 26364–26371, 26373    |

|                                            |           |                              |                            |                                                                                                                                     |
|--------------------------------------------|-----------|------------------------------|----------------------------|-------------------------------------------------------------------------------------------------------------------------------------|
|                                            | 850       | Andranomavohely              | 14°34.165'S<br>49°16.568'E | UADBA 19594                                                                                                                         |
|                                            | 950       | Irony                        | 14°45.140'S<br>48°29.690'E | AMNH A167523*, UADBA 26372                                                                                                          |
|                                            | 400–785   | Tsararano                    | 14°54.667'S<br>49°41.383'E | AMNH A181731*, PBZT FN 6051, 6055                                                                                                   |
|                                            | 525       | Ilampy                       | 15°23.500'S<br>50°02.783'E | PBZT FAZC 10053                                                                                                                     |
| <i>Mantidactylus<br/>macrotympanum</i> nsp | 180       | Antsahabe                    | 13°43.272'S<br>48°39.304'E | AMNH A167598                                                                                                                        |
|                                            | 800       | Antsahatelo                  | 13°51.588'S<br>48°51.979'E | AMNH A167589*                                                                                                                       |
|                                            | 250       | Ambalafary                   | 14°04'S 48°17'E            | UMMZ 201418, UMMZ 201416*–201417, UMMZ 213447*                                                                                      |
| <i>Mantidactylus olgai</i> nsp             | 1700      | Sorata pic                   | 13°41.147'S<br>49°26.511'E | AMNH A167596*                                                                                                                       |
|                                            | 600       | Betaindambo                  | 13°51.932'S<br>48°49.189'E | AMNH A167557                                                                                                                        |
|                                            | 700       | Besahona                     | 13°54.372'S<br>48°44.785'E | AMNH A167484, 167554–16755, UADBA 8383, 8388,                                                                                       |
|                                            | 700       | Maroamalona                  | 13°51.023'S<br>48°47.902'E | AMNH A167560, AMNH A167561–167562                                                                                                   |
|                                            | 600–730   | Ramena                       | 13°55.71'S<br>48°53.179'E  | AMNH A167556, 167558, 167564; UADBA 8386, 8391, 8409,<br>12771                                                                      |
|                                            | 1150–1180 | Antsaravy                    | 13°55.560'S<br>48°54.353'E | AMNH 167565*–167576, UADBA 8387, 8389–8390, UADBA<br>8231, 8375, 8381, 8383–8834, 8387, 8392, 8402–8404, 8407,<br>8409, 8477, 12773 |
|                                            | 760       | Nirhy's cascade Camp Analabe | 13°51.023'S<br>48°47.902'E | AMNH A167563                                                                                                                        |
|                                            | 850       | Andramanalana                | 14°24.400'S<br>49°20.217'E | AMNH A181726*                                                                                                                       |
|                                            | 180       | Antsahabe                    | 13°43.272'S<br>48°39.304'E | AMNH A167598                                                                                                                        |
|                                            | 800       | Antsahatelo                  | 13°51.588'S<br>48°51.979'E | AMNH A167589*                                                                                                                       |



|                                       |           |                                             |                            |                                                                                                               |
|---------------------------------------|-----------|---------------------------------------------|----------------------------|---------------------------------------------------------------------------------------------------------------|
| <i>Mantidactylus tavaratra</i><br>nsp | 530       | Bezavona                                    | 13°31.962'S<br>49°51.954'E | UADBA 19650                                                                                                   |
|                                       | 1240–1350 | Sorata 1                                    | 13°41.147'S<br>49°26.511'E | UADBA 19628, 19630, 19634                                                                                     |
|                                       | 1700      | Sorata pic                                  | 13°41.147'S<br>49°26.511'E | AMNH A167593*, 167595–167596, UADBA19618–19625,<br>19628–19629, 19631–19632, 19634–19639, 19642, 19644, 19656 |
|                                       | 980       | Sorata 2                                    | 13°41.986'S<br>49°26.687'E | AMNH A 167505*, 167597, UADBA 19617, 19643                                                                    |
|                                       | 350–670   | Salafaina montane                           | 13°26.257'S<br>49°43.01'E  | UADBA 19612–19615                                                                                             |
|                                       | 1200      | Bekolosy                                    | 14°02'S 48°18'E            | UMMZ 212440*, UADBA12154–12158                                                                                |
|                                       | 1000      | Manarikoba Manongarivo                      | 14°02.700'S<br>48°47.007'E | PBZT FAZC11068, 11112                                                                                         |
|                                       | 1050      | Antsahamanitsy Tsaratanana                  | 14°02.700'S<br>48°55.008'E | PBZT RJS102, 119; 122                                                                                         |
|                                       | 1200      | Ambinanitelo Tsaratanana                    | 14°04.807'S<br>48°59.123'E | UADBA 26356                                                                                                   |
|                                       | 2650      | Trail to summit of Tsaratanana              | 14°04.807'S<br>48°59.123'E | UMMZ 212833                                                                                                   |
|                                       | 1950–2000 | Matsaborimaiky Tsaratanana                  | 14°09.175'S<br>48°57.431'E | AMNH A167506*–16709, UADBA 26306, 26109, 26116,<br>26306, 26312, 26328, 26336                                 |
|                                       | 1300–1550 | Andampimbazaha or<br>Andasimbazaha Marojejy | 14°26.05'S<br>49°45.7'E    | AMNH A187088*–187089*, A157115, UADBA 3724, 3840,<br>UADBA RAX 11532*–11533*                                  |
|                                       | 1050–1300 | Antranohafa Marojejy                        | 14°26.2'S<br>49°44.5'E     | AMNH A157121–15722                                                                                            |
|                                       | 1500–1600 | Andranomifototra River Marojejy             | 14°26.4'S<br>49°44.5'E     | AMNH A157123–157129, UADBA 15771–15772, 15774–<br>15778                                                       |
|                                       | 600–930   | Andranomavohely                             | 14°34.165'S<br>49°16.568'E | UADBA 19608, UADBA 26230–26231                                                                                |
|                                       | 530       | Ambodivoara                                 | 14°31.873'S<br>49°25.623'E | UADBA 19682                                                                                                   |
|                                       | 1550      | Anjanaharibe–Sud                            | 14°44.5'S<br>49°26.5'E     | UADBA 8117                                                                                                    |
