# Supplementary material for: Revision of the Subgenus Ochthomantis Frogs from Madagascar (Amphibia: Mantellidae) with the Description of Four Species and Resurrection of Mantidactylus catalai and M. poissoni
Source: MDPI journal article supplement (doi:10.3390/ani13172800), 2023-09-03
Supplement: s1 [file s1]

**Table S1.** Samples included in molecular analyses with locality. Samples are grouped according to species as determined by analyses presented here. Voucher specimen identification is provided for samples newly sequenced for this study and Genbank Accession numbers are provided for all samples.

| Species                  | Voucher  | Genbank Accession | Species                        | Voucher  | Genbank Accession |
|--------------------------|----------|-------------------|--------------------------------|----------|-------------------|
| <i>M. peraccae</i>       | -        | AY454391          | <i>M. femoralis</i>            | -        | AY848151          |
| <i>M. cowanii</i>        | -        | MK447691          | <i>M. femoralis</i>            | -        | AY848138          |
| <i>M. lugubris</i>       | -        | AY341710          | <i>M. femoralis</i>            |          | HQ610916          |
| <i>M. guttulatus</i>     | -        | FJ559237          | <i>M. femoralis</i>            |          | HQ610913          |
| <i>M. ambony</i>         | RAN38009 | OR466827          | <i>M. femoralis</i>            |          | HQ610914          |
| <i>M. ambony</i>         | -        | AY324822          | <i>M. macrotympanum</i> n. sp. | RAN39170 | OR466806          |
| <i>M. ambony</i>         | -        | HQ610870          | <i>M. macrotympanum</i> n. sp. | RAN39125 | OR466807          |
| <i>M. ambreensis</i>     | RAX6552  | OR466843          | <i>M. macrotympanum</i> n. sp. | RAX2715  | OR466808          |
| <i>M. ambreensis</i>     | RAX9589  | OR466844          | <i>M. majori</i>               | RAX8907  | OR466809          |
| <i>M. ambreensis</i>     | RAN38501 | OR466846          | <i>M. mocquardi</i>            | RAN42737 | OR466835          |
|                          | -        | AY848129          | <i>M. mocquardi</i>            | RAX7524  | OR466836          |
| <i>M. catalai</i>        | RAN44491 | OR466824          | <i>M. mocquardi</i>            | RAX9022  | OR466837          |
| <i>M. catalai</i>        | RAX10563 | OR466825          | <i>M. mocquardi</i>            | RAX3669  | OR466838          |
| <i>M. catalai</i>        | RAX10599 | OR466826          | <i>M. mocquardi</i>            | RAN37992 | OR466839          |
| <i>M. catalai</i>        | -        | AY324821          | <i>M. mocquardi</i>            | RAX3641  | OR466840          |
| <i>M. danieli</i> n. sp. | RAN38186 | OR466829          | <i>M. mocquardi</i>            | RAX4670  | OR466841          |
| <i>M. danieli</i> n. sp. | RAX10204 | OR466830          | <i>M. mocquardi</i>            | RAX3915  | OR466842          |
| <i>M. danieli</i> n. sp. | RAX4268  | OR466831          | <i>M. mocquardi</i>            | -        | AF215317          |
| <i>M. danieli</i> n. sp. | RAX10392 | OR466832          | <i>M. mocquardi</i>            | -        | HQ610921          |
| <i>M. danieli</i> n. sp. | RAX6595  | OR466833          | <i>M. mocquardi</i>            | -        | JX570508          |
| <i>M. danieli</i> n. sp. | RAN39387 | OR466834          | <i>M. mocquardi</i>            | -        | HQ610861          |
| <i>M. danieli</i> n. sp. | -        | AY324818          | <i>M. mocquardi</i>            | -        | AY848150          |
| <i>M. danieli</i> n. sp. | -        | AY324816          | <i>M. olgae</i> n. sp.         | RAX3203  | OR466821          |
| <i>M. femoralis</i>      | RAX2703  | OR466810          | <i>M. olgae</i> n. sp.         | RAX5195  | OR466822          |
| <i>M. femoralis</i>      | RAX2761  | OR466811          | <i>M. olgae</i> n. sp.         | RAX10205 | OR466823          |

|                     |          |          |                            |          |          |
|---------------------|----------|----------|----------------------------|----------|----------|
| <i>M. femoralis</i> | RAX6345  | OR466812 | <i>M. poissoni</i>         | RAX9367  | OR466847 |
| <i>M. femoralis</i> | RAX8133  | OR466813 | <i>M. tavaratra</i> n. sp. | RAX11535 | OR466848 |
| <i>M. femoralis</i> | RAX7523  | OR466814 | <i>M. tavaratra</i> n. sp. | RAX11534 | OR466849 |
| <i>M. femoralis</i> | RAX9498  | OR466815 | <i>M. tavaratra</i> n. sp. | RAX11533 | OR466850 |
| <i>M. femoralis</i> | RAX7196  | OR466816 | <i>M. tavaratra</i> n. sp. | RAX11532 | OR466851 |
| <i>M. femoralis</i> | RAX10901 | OR466817 | <i>M. tavaratra</i> n. sp. | RAX10323 | OR466852 |
| <i>M. femoralis</i> | RAX10606 | OR466818 | <i>M. tavaratra</i> n. sp. | RAN39071 | OR466853 |
| <i>M. femoralis</i> | RAN35289 | OR466819 | <i>M. tavaratra</i> n. sp. | RAX6901  | OR466854 |
| <i>M. femoralis</i> | RAX8896  | OR466820 | <i>M. tavaratra</i> n. sp. | RAX5769  | OR466855 |
| <i>M. femoralis</i> | -        | AY843698 | <i>M. tavaratra</i> n. sp. | RAX6028  | OR466856 |
| <i>M. femoralis</i> | -        | HQ610845 | <i>M. tavaratra</i> n. sp. | RAX6107  | OR466857 |
| <i>M. femoralis</i> | -        | HM364726 | <i>M. tavaratra</i> n. sp. | RAX6838  | OR466858 |
| <i>M. femoralis</i> | -        | HQ610917 | <i>M. tavaratra</i> n. sp. | RAN43366 | OR466859 |
| <i>M. femoralis</i> | -        | HQ610907 | <i>M. tavaratra</i> n. sp. | RAX5310  | OR466860 |
| <i>M. femoralis</i> | -        | HQ610911 | <i>M. tavaratra</i> n. sp. | RAX5400  | OR466861 |
| <i>M. femoralis</i> | -        | AY324815 | <i>M. tavaratra</i> n. sp. | RAX5000  | OR466828 |
| <i>M. femoralis</i> | -        | GU975183 | <i>M. tavaratra</i> n. sp. | -        | AY324819 |
| <i>M. femoralis</i> | -        | AY324817 | <i>M. tavaratra</i> n. sp. | -        | AY324820 |
| <i>M. femoralis</i> | -        | JF903917 | <i>zolitschka</i>          | -        | HQ610866 |
| <i>M. femoralis</i> | -        | HQ610847 | <i>zolitschka</i>          | -        | HQ610867 |
| <i>M. femoralis</i> | -        | HQ610918 |                            |          |          |

| Sample    | Voucher catalog | Molecular ID         | Locality                                   |
|-----------|-----------------|----------------------|--------------------------------------------|
| RAX 2373  | A167482         | <i>M. ambreensis</i> | Betaindambo, Tsaratanana 530 m             |
| RAX 6552  | A167501         | <i>M. ambreensis</i> | Irony River 970 m                          |
| RAX 9589  | A174618         | <i>M. ambreensis</i> | Ambohibola Forest, 300 m                   |
| RAN 38501 | UMMZ 212435     | <i>M. ambreensis</i> | Montagne d'Ambre Antomboka Fitsahana 650 m |
| RAN 38009 | UMMZ 212426     | <i>M. ambony</i>     | Montagne d'Ambre Antomboka River 1150 m    |
| RAX 7196  | A174623         | <i>M. femoralis</i>  | Ankafina Forest 1420 m                     |

|           |             |                            |                                            |
|-----------|-------------|----------------------------|--------------------------------------------|
| RAX 7523  | A174627     | <i>M. femoralis</i>        | Betampona Strict Nature Reserve 350 m      |
| RAN 35289 | UMMZ197651  | <i>M. femoralis</i>        | Manantantely forest 90 m                   |
| RAX 10606 | A181735     | <i>M. femoralis</i>        | Beampingaratra Pass, Anosy Montane 520 m   |
| RAX 8896  | A174651     | <i>M. femoralis</i>        | Kianjavato-Vatovavy 150 m                  |
| RAX 2703  | A167580     | <i>M. femoralis</i>        | Antsahatelo, Tsaratanana Reserve 800 m     |
| RAX 2761  | A167581     | <i>M. femoralis</i>        | Ramena 730 m                               |
| RAX 6345  | A167521     | <i>M. femoralis</i>        | Bemanevika Lakes 1450 m                    |
| RAX 10955 | UADBA       | <i>M. femoralis</i>        | Mandraka 1140 m                            |
| RAX 10901 | A187128     | <i>M. femoralis</i>        | Itremo 1650 m                              |
| RAX 8133  | A174646     | <i>M. femoralis</i>        | Manasamena 950 m                           |
| RAX 9498  | A174654     | <i>M. femoralis</i>        | Ambohibevavy-Vasiana 850 m                 |
| RAN 42737 | UMMZ 212881 | <i>M. mocquardi</i>        | Ankavanana river, Masoala 70-100 m         |
| RAX 7524  | A174628     | <i>M. mocquardi</i>        | Betampona Strict Nature Reserve 350 m      |
| RAX 9022  | A174652     | <i>M. mocquardi</i>        | Ambodiriana 100 m                          |
| RAN 37992 | UMMZ 212824 | <i>M. mocquardi</i>        | Manantenina River, Marojejy Reserve 700 m  |
| RAX 3641  | UADBA 19647 | <i>M. mocquardi</i>        | Ambolokopatrika, Bataolana-Andapa 810 m    |
| RAX 3669  | A174621     | <i>M. mocquardi</i>        | Ambolokopatrika, Betaolana-Andapa 860 m    |
| RAX 4670  | A174622     | <i>M. mocquardi</i>        | Ankitsika, Vohemar 600 m                   |
| RAX 3915  | A167587     | <i>M. mocquardi</i>        | Bezavona, Vohemar 530 m                    |
| RAX 9367  | A174653     | <i>M. poissoni</i>         | Mandraka 1250 m                            |
| RAN 44491 | UMMZ 212890 | <i>M. catalai</i>          | Iatara river, Andringitra 720 m            |
| RAX 10563 | A181732     | <i>M. catalai</i>          | Beampingaratra Pass, Anosy Montane 490 m   |
| RAX 10599 | A181821     | <i>M. catalai</i>          | Beampingaratra Pass, Anosy Montane 1140 m  |
| RAX 4268  | A167590     | <i>M. danieli</i> n. sp.   | Salafaina 400m                             |
| RAX 10204 | A181773     | <i>M. danieli</i> n. sp.   | Andramanalana 840 m                        |
| RAN 38186 | UMMZ 212827 | <i>M. danieli</i> n. sp.   | Antomboka river, Montagne d'Ambre 1150 m   |
| RAN 39387 | UMMZ 212836 | <i>M. danieli</i> n. sp.   | Antsahabe river, Manongarivo Reserve 180 m |
| RAX 10392 | A181731     | <i>M. danieli</i> n. sp.   | Tsararano 490 m                            |
| RAX 6595  | A167523     | <i>M. danieli</i> n. sp.   | Irony River 970 m                          |
| RAN 39071 | UMMZ 212440 | <i>M. tavaratra</i> n. sp. | Bekolosy, Manongarivo Reserve 1100 m       |
| RAX 10323 | A181730     | <i>M. tavaratra</i> n. sp. | Andramanalana 1300m                        |

|           |                          |                                 |                                                 |
|-----------|--------------------------|---------------------------------|-------------------------------------------------|
| RAX 5769  | A167510                  | <i>M. tavaratra</i> n. sp.      | Befosa, Tsaratanana 1680@1700 m                 |
| RAX 6028  | A167515                  | <i>M. tavaratra</i> n. sp.      | Bemanevika Lakes 1600 m                         |
| RAX 6107  | A167516                  | <i>M. tavaratra</i> n. sp.      | Bemanevika Lakes 1600 m                         |
| RAX 6901  | A167525                  | <i>M. tavaratra</i> n. sp.      | Lohanandroranga 1440 m                          |
| RAX 6838  | A167524                  | <i>M. tavaratra</i> n. sp.      | Lohanandroranga 1650 m                          |
| RAN 43366 | UMMZ 212889              | <i>M. tavaratra</i> n. sp.      | Befosa river, Tsaratanana 1630 m                |
| RAX 5310  | A167505                  | <i>M. tavaratra</i> n. sp.      | Befosa, Tsaratanana 1600 m                      |
| RAX 5400  | A167506                  | <i>M. tavaratra</i> n. sp.      | Matsaborimaiky Lake, Tsaratanana Reserve 1950 m |
| RAX 11532 | none                     | <i>M. tavaratra</i> n. sp.      | Marojejy 1550 m                                 |
| RAX 11533 | none                     | <i>M. tavaratra</i> n. sp.      | Marojejy 1550 m                                 |
| RAX 11534 | A187088                  | <i>M. tavaratra</i> n. sp.      | Marojejy 1550 m                                 |
| RAX 11535 | A187089                  | <i>M. tavaratra</i> n. sp.      | Marojejy 1550 m                                 |
| RAX 5000  | A167593                  | <i>M. tavaratra</i> n. sp.      | Sorata 1300@1350 m                              |
| RAX 3203  | A167565                  | <i>M. olgai</i> n. sp.          | Antsaravy Ridge, Tsaratanana Reseve 1150 m      |
| RAX 5195  | A167596                  | <i>M. olgai</i> n. sp.          | Sorata 970 m                                    |
| RAX 10205 | A181726                  | <i>M. olgai</i> n. sp.          | Andramanalana 850 m                             |
| RAN 39170 | UMMZ 201416              | <i>M. macrotympanum</i> n. sp.  | Ambalafary, Manongarivo 250 m                   |
| RAX 2715  | A167599                  | <i>M. macrotympanum</i> n. sp.  | Antsahatelo, Tsaratanana Reserve 800 m          |
| RAN 39125 | UMMZ 213447              | <i>M. macrotympanum</i> n. sp.  | Ambalafary, Manongarivo 250 m                   |
| GENBANK   | HQ610866 (ZSM 1768/2007) | <i>M. zolitschka</i>            | An'ala Forest 840 m                             |
| GENBANK   | HQ610867 (ZSM 1841/2007) | <i>M. zolitschka</i>            | An'ala Forest 840 m                             |
| RAX 8907  | A174620                  | <i>M. majori</i>                | Kianjavato-Vatovavy 150 m                       |
| GENBANK   | AY454391                 | <i>Spinomantis peraccae</i>     |                                                 |
| GENBANK   | MK447691                 | <i>Mantidactylus cowanii</i>    |                                                 |
| GENBANK   | AY341710                 | <i>Mantidactylus lugubris</i>   |                                                 |
| GENBANK   | FJ559237                 | <i>Mantidactylus guttulatus</i> |                                                 |

---
