# Supplementary material for: Revision of the Subgenus Ochthomantis Frogs from Madagascar (Amphibia: Mantellidae) with the Description of Four Species and Resurrection of Mantidactylus catalai and M. poissoni
Source: MDPI journal article supplement (doi:10.3390/ani13172800), 2023-09-03
Supplement: s1 [file s1]

**Table S2.** Measurement data for *Mantidactylus femoralis*. All measurements in mm. BMNH: specimen data from Glaw and Vences (2004). F: female, M: male, SA: subadulte, J: juvenile

| Specimen                       | Sexes | SVL  | TD  | ED  | EN  | EST | NS  | NN  | HW   | HL   | HDL  | RC   | FE   | TI   | FT   | TA   | EO  | EM  | EHEAD | T1  | TO3 | TO5 |
|--------------------------------|-------|------|-----|-----|-----|-----|-----|-----|------|------|------|------|------|------|------|------|-----|-----|-------|-----|-----|-----|
| AMNH A167521 <sup>b</sup>      | SA    | 43.3 | 4.9 | 4.0 | 2.0 | 1.3 | 1.7 | 4.4 | 14.5 | 19.6 | 13.4 | 7.9  | 21.8 | 22.5 | 23.5 | 10.5 | 4.0 | 2.3 | 5.7   | 1.5 | 5.7 | 6.1 |
| AMNH A167580 <sup>b</sup>      | J     | 23.8 | -   | -   | -   | -   | -   | -   | -    | -    | -    | -    | -    | -    | -    | -    | -   | -   | -     | -   | -   | -   |
| BMNH 1947.2.22.65 <sup>a</sup> | F     | 51.2 | 3.7 | 5.6 | 4.2 | ⊙   | 2.4 | 4.3 | 16.4 | 17.8 | 13.5 | -    | -    | -    | -    | -    | -   | -   | -     | -   | -   | -   |
| AMNH A167582                   | F     | 51.4 | 6.2 | 9.2 | 4.2 | 0.9 | 1.7 | 4.5 | 18.7 | 21.7 | 14.2 | 10.0 | 27.2 | 27.6 | 28.0 | 13.3 | 9.2 | 3.4 | 8.4   | 1.8 | 7.3 | 7.7 |
| AMNH A174623 <sup>b</sup>      | F     | 45.4 | 3.7 | 5.2 | 3.8 | 2.1 | 2.4 | 4.1 | 14.3 | 19.8 | 13.6 | 8.7  | 23.2 | 23.8 | 25.4 | 11.7 | 6.8 | 2.6 | 6.7   | 1.6 | 6.4 | 7.6 |
| AMNH A174646 <sup>b</sup>      | F     | 47.9 | 3.5 | 5.3 | 4.3 | 2.2 | 2.1 | 3.9 | 16.3 | 20.1 | 15.3 | 9.8  | 27.6 | 29.3 | 29.3 | 13.5 | 7.1 | 2.5 | 7.1   | 1.8 | 7.6 | 8.7 |
| UADBA 1410                     | F     | 45.1 | 4.4 | 6.1 | 4.4 | 1.8 | 1.6 | 4.9 | 17.3 | 22.0 | 15.1 | 8.6  | 26.0 | 28.7 | 28.0 | 13.2 | 9.3 | 3.5 | 8.0   | 1.7 | 6.7 | 7.9 |
| UADBA 1411                     | F     | 50.7 | 4.0 | 6.7 | 5.3 | 2.2 | 1.6 | 4.8 | 18.0 | 22.4 | 14.8 | 10.0 | 25.7 | 29.3 | 27.6 | 13.4 | 9.1 | 2.8 | 8.4   | 2.1 | 6.8 | 8.8 |
| UADBA 1415                     | F     | 43.4 | 4.1 | 6.4 | 4.6 | 2.1 | 1.6 | 4.9 | 17.3 | 21.5 | 14.1 | 9.5  | 25.9 | 28.6 | 26.0 | 11.0 | 8.3 | 3.3 | 7.6   | 2.1 | 7.2 | 8.2 |
| UADBA 1417                     | F     | 51.8 | 4.0 | 6.7 | 4.3 | 2.5 | 3.0 | 5.5 | 17.8 | 23.2 | 13.8 | 9.1  | 25.5 | 28.0 | 26.2 | 12.0 | 9.5 | 3.5 | 8.0   | 1.9 | 7.2 | 8.0 |
| UADBA 1418                     | F     | 54.1 | 4.3 | 6.6 | 4.8 | 2.0 | 2.6 | 5.2 | 17.9 | 23.0 | 15.1 | 9.4  | 28.0 | 29.2 | 26.7 | 12.7 | 9.3 | 2.7 | 8.2   | 2.2 | 7.5 | 8.6 |
| UADBA 1422                     | F     | 59.0 | 4.5 | 7.4 | 5.0 | 3.1 | 2.6 | 5.4 | 19.6 | 23.9 | 16.9 | 10.9 | 29.8 | 30.1 | 30.0 | 13.1 | 9.9 | 3.3 | 8.1   | 2.1 | 8.0 | 9.0 |
| UADBA 3710                     | F     | 49.0 | 4.2 | 6.3 | 4.0 | 1.6 | 2.1 | 5.0 | 17.4 | 19.6 | 14.0 | 9.3  | 26.7 | 26.5 | 25.0 | 12.8 | 8.6 | 3.5 | 9.0   | 1.8 | 6.8 | 7.0 |
| UADBA 4515                     | F     | 47.2 | 4.0 | 5.9 | 4.6 | 2.5 | 3.0 | 4.1 | 17.0 | 22.0 | 13.8 | 8.6  | 24.5 | 26.0 | 26.0 | 12.1 | 8.8 | 2.6 | 7.1   | 1.7 | 5.9 | 7.2 |
| UADBA 5828                     | F     | 45.7 | 4.0 | 6.1 | 4.5 | 2.1 | 3.0 | 5.0 | 10.9 | 21.1 | 14.1 | 8.4  | 24.0 | 25.2 | 25.5 | 11.4 | 7.7 | 2.9 | 7.0   | 1.4 | 5.6 | 6.8 |
| UADBA 6280                     | F     | 51.6 | 4.2 | 7.1 | 4.2 | 2.0 | 3.0 | 5.0 | 17.9 | 21.7 | 15.9 | 10.2 | 28.7 | 28.8 | 30.0 | 14.0 | 9.2 | 3.0 | 7.8   | 2.1 | 7.7 | 8.6 |
| UADBA 6281                     | F     | 55.8 | 3.0 | 6.1 | 4.4 | 2.0 | 3.2 | 5.3 | 18.1 | 22.4 | 16.6 | 10.2 | 30.0 | 30.1 | 30.4 | 13.9 | 9.2 | 2.9 | 7.4   | 2.2 | 7.8 | 9.8 |
| UADBA 7516                     | F     | 50.1 | 3.6 | 5.8 | 4.0 | 2.2 | 2.9 | 4.7 | 17.1 | 21.4 | 15.1 | 10.4 | 27.6 | 29.5 | 29.7 | 12.1 | 7.4 | 2.8 | 7.4   | 2.1 | 7.3 | 8.9 |
| UADBA 7517                     | F     | 54.5 | 4.5 | 6.7 | 4.7 | 2.4 | 2.4 | 5.1 | 17.9 | 23.2 | 14.6 | 8.4  | 24.4 | 27.2 | 27.3 | 13.3 | 9.3 | 3.2 | 8.2   | 2.2 | 6.6 | 7.9 |
| UADBA 7778                     | F     | 45.2 | 3.5 | 5.8 | 3.5 | 2.3 | 2.4 | 4.0 | 15.1 | 24.1 | 13.5 | 8.9  | 25.0 | 25.5 | 26.5 | 11.5 | 7.6 | 2.4 | 7.0   | 1.4 | 6.3 | 7.5 |
| UADBA 8527                     | F     | 48.9 | 3.8 | 5.8 | 4.0 | 2.2 | 2.3 | 4.1 | 14.7 | 20.0 | 14.0 | 9.2  | 25.9 | 26.3 | 27.6 | 11.0 | 7.5 | 2.6 | 6.8   | 1.7 | 7.3 | 8.3 |
| UADBA 9251                     | F     | 54.0 | 4.4 | 6.6 | 4.4 | 2.3 | 2.5 | 5.3 | 17.4 | 22.6 | 16.1 | 10.8 | 25.8 | 27.7 | 28.5 | 13.0 | 8.6 | 2.8 | 7.6   | 2.1 | 7.5 | 9.6 |
| UADBA 9775                     | F     | 46.5 | 3.8 | 5.9 | 4.0 | 2.3 | 2.8 | 4.2 | 15.9 | 20.6 | 14.0 | 8.0  | 24.3 | 24.5 | 25.0 | 12.6 | 8.1 | 2.6 | 6.9   | 1.8 | 6.4 | 7.7 |
| UADBA 9777                     | F     | 43.3 | 3.2 | 4.6 | 3.3 | 1.5 | 2.0 | 3.7 | 14.7 | 17.3 | 13.1 | 7.8  | 20.6 | 21.6 | 23.4 | 9.8  | 7.1 | 2.6 | 5.9   | 1.4 | 6.1 | 7.1 |
| UADBA 9778                     | F     | 41.8 | 3.5 | 4.7 | 3.7 | 1.7 | 2.2 | 3.7 | 14.1 | 18.6 | 12.6 | 7.9  | 21.6 | 22.4 | 23.6 | 10.6 | 6.1 | 2.2 | 5.5   | 1.6 | 6.2 | 7.2 |
| UADBA 9784                     | F     | 41.1 | 3.5 | 5.1 | 3.6 | 2.2 | 2.6 | 4.2 | 13.7 | 18.0 | 11.7 | 8.1  | 20.6 | 21.6 | 23.7 | 12.5 | 7.3 | 2.6 | 5.3   | 1.8 | 5.9 | 6.0 |
| UADBA 9787                     | F     | 37.4 | 2.8 | 4.5 | 3.1 | 1.3 | 1.1 | 3.5 | 12.7 | 16.4 | 11.7 | 6.5  | 20.0 | 21.0 | 22.2 | 11.0 | 6.0 | 2.3 | 7.2   | 1.6 | 6.1 | 6.2 |
| UADBA 11886                    | F     | 39.1 | 3.3 | 4.8 | 3.4 | 2.0 | 2.3 | 3.8 | 13.2 | 17.8 | 11.5 | 8.3  | 21.2 | 23.4 | 22.0 | 12.0 | 6.9 | 2.2 | 5.8   | 1.7 | 5.4 | 6.3 |

|             |   |      |     |     |     |     |     |     |      |      |      |      |      |      |      |      |      |     |     |     |     |      |
|-------------|---|------|-----|-----|-----|-----|-----|-----|------|------|------|------|------|------|------|------|------|-----|-----|-----|-----|------|
| UADBA 11977 | F | 57.4 | 4.1 | 5.6 | 5.0 | 1.9 | 2.7 | 4.9 | 18.3 | 24.3 | 15.8 | 9.8  | 27.3 | 30.6 | 30.6 | 13.8 | 9.4  | 3.3 | 8.1 | 1.9 | 9.1 | 10.0 |
| UADBA 12306 | F | 51.2 | 4.2 | 5.7 | 4.6 | 2.2 | 2.6 | 4.9 | 18.0 | 22.4 | 15.4 | 10.3 | 30.4 | 32.7 | 30.7 | 13.6 | 9.0  | 3.3 | 8.0 | 2.3 | 8.0 | 8.7  |
| UADBA 12453 | F | 47.4 | 3.7 | 5.3 | 4.3 | 2.4 | 2.4 | 4.9 | 16.4 | 20.6 | 15.8 | 9.0  | 26.5 | 26.7 | 28.2 | 13.0 | 8.0  | 3.1 | 7.0 | 1.4 | 7.9 | 8.5  |
| UADBA 19657 | F | 55.5 | 4.4 | 7.1 | 7.0 | 2.4 | 3.3 | 4.8 | 18.0 | 23.0 | 16.0 | 10.1 | 28.7 | 29.8 | 30.7 | 13.2 | 9.1  | 2.6 | 8.4 | 2.6 | 7.6 | 9.0  |
| UADBA 19663 | F | 44.1 | 3.5 | 5.4 | 4.0 | 2.0 | 2.4 | 4.4 | 14.6 | 18.4 | 14.4 | 8.7  | 23.6 | 25.8 | 25.8 | 11.5 | 7.6  | 2.6 | 6.9 | 1.6 | 7.0 | 7.7  |
| UADBA 19665 | F | 55.5 | 4.2 | 7.1 | 4.4 | 2.7 | 3.0 | 4.8 | 18.0 | 22.3 | 15.2 | 10.1 | 27.8 | 30.3 | 28.6 | 12.0 | 9.4  | 3.4 | 8.2 | 2.3 | 7.5 | 9.3  |
| UADBA 19666 | F | 53.4 | 3.7 | 7.0 | 4.4 | 2.9 | 2.9 | 4.2 | 17.6 | 21.7 | 15.8 | 10.6 | 26.6 | 29.4 | 30.1 | 12.4 | 8.7  | 3.2 | 7.8 | 2.0 | 7.9 | 8.4  |
| UADBA 19667 | F | 59.4 | 4.3 | 7.6 | 5.1 | 2.7 | 2.9 | 4.7 | 19.7 | 25.7 | 16.3 | 10.0 | 29.8 | 30.5 | 30.7 | 13.6 | 9.8  | 3.1 | 9.0 | 2.4 | 8.2 | 9.3  |
| UADBA 19668 | F | 52.6 | 4.3 | 6.6 | 4.9 | 1.8 | 2.7 | 4.3 | 17.9 | 21.6 | 15.4 | 10.2 | 26.6 | 28.2 | 29.6 | 12.5 | 9.4  | 3.3 | 7.6 | 2.1 | 7.2 | 8.6  |
| UADBA 19669 | F | 58.0 | 4.8 | 7.1 | 5.3 | 2.0 | 2.8 | 4.8 | 19.4 | 22.8 | 15.5 | 11.1 | 28.4 | 30.4 | 29.2 | 12.8 | 9.8  | 3.1 | 8.6 | 2.3 | 7.3 | 8.8  |
| UADBA 19670 | F | 62.4 | 4.7 | 7.7 | 5.4 | 2.1 | 2.2 | 4.8 | 20.3 | 25.0 | 16.3 | 12.3 | 28.4 | 30.3 | 30.7 | 13.0 | 10.3 | 3.4 | 9.0 | 2.4 | 8.2 | 9.5  |
| UADBA 19675 | F | 57.4 | 4.6 | 7.2 | 4.6 | 2.5 | 1.8 | 5.0 | 19.5 | 24.2 | 17.2 | 10.8 | 27.6 | 32.3 | 32.1 | 15.5 | 9.4  | 3.5 | 9.4 | 2.5 | 8.4 | 9.6  |
| UADBA 19676 | F | 53.7 | 3.8 | 6.4 | 5.2 | 2.8 | 2.8 | 4.9 | 18.5 | 23.8 | 15.5 | 10.9 | 28.8 | 30.3 | 29.2 | 13.3 | 9.4  | 3.2 | 8.3 | 2.2 | 7.7 | 9.3  |
| UADBA 19677 | F | 41.8 | 3.7 | 5.4 | 3.8 | 1.8 | 2.7 | 3.9 | 14.3 | 18.0 | 14.0 | 8.3  | 22.8 | 24.6 | 24.4 | 11.0 | 7.3  | 2.5 | 6.3 | 1.6 | 6.1 | 7.3  |
| UADBA 19691 | F | 52.4 | 4.3 | 6.2 | 4.9 | 2.6 | 2.6 | 5.0 | 19.3 | 23.0 | 15.8 | 9.9  | 29.8 | 31.6 | 30.8 | 13.4 | 9.2  | 3.2 | 7.7 | 2.0 | 7.6 | 9.2  |
| UADBA 19693 | F | 45.6 | 3.8 | 5.7 | 4.6 | 2.1 | 2.6 | 4.3 | 16.0 | 20.2 | 14.8 | 9.5  | 27.3 | 27.8 | 28.1 | 11.6 | 7.5  | 2.8 | 7.2 | 1.5 | 7.0 | 8.1  |
| UADBA 19694 | F | 49.7 | 3.6 | 6.2 | 4.5 | 2.0 | 1.4 | 5.0 | 17.1 | 22.1 | 15.4 | 9.4  | 27.5 | 30.6 | 29.2 | 14.4 | 9.0  | 3.0 | 7.3 | 1.7 | 8.0 | 8.7  |
| UADBA 19696 | F | 47.9 | 3.2 | 5.3 | 4.0 | 2.4 | 2.4 | 4.3 | 14.7 | 20.0 | 13.3 | 7.1  | 21.9 | 24.4 | 24.3 | 11.0 | 8.0  | 2.6 | 6.7 | 1.1 | 6.6 | 7.5  |
| UADBA 20479 | F | 51.0 | 4.0 | 6.1 | 2.9 | 1.5 | 2.3 | 3.0 | 17.3 | 21.4 | 14.4 | 8.0  | 26.5 | 27.3 | 27.4 | 13.0 | 8.4  | 2.6 | 7.7 | 1.9 | 7.0 | 8.2  |
| UADBA 26380 | F | 43.0 | 3.6 | 5.6 | 3.4 | 2.0 | 2.3 | 3.9 | 14.3 | 18.1 | 12.6 | 8.3  | 22.7 | 24.4 | 24.0 | 11.1 | 7.2  | 2.3 | 5.8 | 1.4 | 6.1 | 7.6  |
| UADBA 26281 | F | 45.2 | 3.8 | 5.9 | 3.7 | 2.5 | 2.0 | 4.0 | 15.1 | 20.4 | 13.4 | 8.0  | 20.8 | 23.0 | 24.4 | 9.9  | 7.1  | 2.9 | 6.6 | 1.6 | 5.6 | 6.8  |
| UADBA 26282 | F | 55.9 | 4.1 | 6.4 | 4.8 | 2.8 | 2.4 | 5.0 | 18.8 | 23.6 | 16.4 | 9.4  | 26.7 | 26.8 | 28.7 | 12.9 | 9.4  | 3.2 | 8.1 | 2.0 | 7.3 | 8.0  |
| UADBA 26283 | F | 46.2 | 3.8 | 5.8 | 3.8 | 2.6 | 3.0 | 4.4 | 16.5 | 19.6 | 13.4 | 8.4  | 23.3 | 24.2 | 25.1 | 11.5 | 7.6  | 3.1 | 7.0 | 1.8 | 6.3 | 7.6  |
| UADBA 26284 | F | 45.7 | 3.8 | 5.8 | 4.4 | 2.5 | 3.1 | 4.4 | 15.1 | 19.5 | 13.0 | 7.3  | 21.5 | 22.5 | 23.7 | 10.9 | 7.0  | 2.3 | 6.6 | 1.4 | 6.0 | 7.0  |
| UADBA 26266 | F | 40.1 | 2.8 | 4.4 | 3.2 | 2.0 | 1.7 | 3.5 | 13.4 | 16.2 | 12.1 | 8.1  | 23.0 | 24.7 | 23.1 | 9.5  | 6.4  | 2.2 | 5.9 | 1.4 | 6.3 | 6.6  |
| UADBA 26363 | F | 52.6 | 4.2 | 6.6 | 4.5 | 2.2 | 3.3 | 4.9 | 18.1 | 22.5 | 16.1 | 9.6  | 26.9 | 28.3 | 28.6 | 13.6 | 9.4  | 3.2 | 8.3 | 1.8 | 7.5 | 8.5  |
| UADBA 26378 | F | 47.3 | 4.0 | 6.4 | 4.3 | 2.5 | 2.3 | 4.3 | 15.8 | 20.5 | 14.5 | 9.1  | 25.6 | 26.5 | 26.7 | 12.0 | 7.6  | 2.6 | 7.3 | 1.6 | 7.1 | 8.1  |
| UADBA 26379 | F | 54.3 | 4.1 | 6.7 | 4.7 | 2.8 | 2.6 | 5.4 | 18.9 | 24.6 | 16.0 | 9.3  | 28.9 | 29.6 | 30.1 | 15.3 | 10.0 | 3.6 | 9.5 | 2.0 | 9.2 | 9.8  |
| UADBA 26385 | F | 51.4 | 4.3 | 6.2 | 4.0 | 2.5 | 2.1 | 4.0 | 16.9 | 20.7 | 15.4 | 9.8  | 25.8 | 29.3 | 29.2 | 12.8 | 8.5  | 2.8 | 7.9 | 2.6 | 7.3 | 8.5  |
| UADBA 26386 | F | 52.3 | 3.5 | 6.5 | 4.3 | 2.1 | 2.7 | 4.4 | 17.3 | 21.6 | 14.4 | 8.2  | 26.6 | 29.6 | 28.4 | 12.8 | 9.1  | 2.9 | 7.6 | 2.0 | 7.7 | 7.8  |
| UADBA 26387 | F | 52.5 | 3.4 | 6.3 | 4.9 | 2.1 | 2.8 | 4.6 | 18.3 | 24.1 | 15.4 | 8.6  | 26.2 | 29.2 | 27.8 | 13.3 | 9.0  | 3.2 | 8.7 | 2.0 | 7.1 | 7.5  |
| UADBA 26388 | F | 45.2 | 3.6 | 5.7 | 4.1 | 2.4 | 2.8 | 4.2 | 15.8 | 18.0 | 14.4 | 9.2  | 25.3 | 27.4 | 27.6 | 11.6 | 8.1  | 2.8 | 7.3 | 1.6 | 7.2 | 8.6  |
| UADBA 26389 | F | 44.2 | 3.4 | 5.6 | 3.4 | 2.7 | 2.7 | 3.6 | 13.6 | 18.8 | 14.5 | 8.7  | 23.4 | 24.7 | 26.8 | 11.8 | 7.1  | 2.4 | 6.7 | 1.8 | 6.8 | 8.0  |

|                           |   |      |     |     |     |     |     |     |      |      |      |      |      |      |      |      |     |     |     |     |     |     |
|---------------------------|---|------|-----|-----|-----|-----|-----|-----|------|------|------|------|------|------|------|------|-----|-----|-----|-----|-----|-----|
| UADBA 26390               | F | 50.6 | 4.1 | 6.2 | 4.3 | 2.5 | 2.5 | 4.8 | 16.6 | 22.7 | 14.6 | 10.6 | 27.8 | 28.1 | 28.1 | 13.0 | 8.7 | 3.0 | 8.2 | 2.2 | 7.2 | 8.5 |
| UADBA 26391               | F | 54.0 | 4.6 | 6.0 | 4.5 | 1.6 | 2.8 | 4.8 | 18.7 | 22.8 | 15.1 | 9.2  | 28.3 | 28.8 | 28.9 | 13.6 | 9.5 | 3.6 | 8.6 | 1.8 | 7.5 | 7.9 |
| UADBA 26392               | F | 55.3 | 4.2 | 7.0 | 4.6 | 2.7 | 2.9 | 4.9 | 17.2 | 22.7 | 16.0 | 10.0 | 29.2 | 30.5 | 29.6 | 14.3 | 8.6 | 3.2 | 8.3 | 2.0 | 7.7 | 7.8 |
| UADBA 26395               | F | 52.8 | 4.0 | 7.2 | 4.4 | 2.1 | 1.5 | 4.0 | 18.2 | 22.0 | 13.7 | 9.8  | 25.2 | 27.8 | 27.4 | 13.0 | 9.6 | 2.7 | 8.1 | 2.1 | 6.6 | 7.6 |
| UADBA 26396               | F | 51.4 | 4.3 | 6.4 | 4.4 | 1.8 | 2.1 | 4.2 | 17.4 | 20.5 | 14.8 | 9.3  | 26.2 | 28.3 | 27.2 | 12.9 | 8.4 | 2.8 | 7.1 | 2.1 | 7.7 | 8.7 |
| UADBA 26397               | F | 46.6 | 3.5 | 5.3 | 4.1 | 1.9 | 1.0 | 4.3 | 16.0 | 20.4 | 14.2 | 8.4  | 26.4 | 26.4 | 25.4 | 11.6 | 8.3 | 2.8 | 7.0 | 1.6 | 6.7 | 8.2 |
| AMNH A167581 <sup>b</sup> | M | 40.2 | 4.7 | 7.5 | 3.4 | 1.4 | 1.8 | 3.0 | 13.6 | 17.8 | 12.2 | 7.1  | 19.3 | 20.5 | 21.6 | 9.7  | 7.5 | 2.4 | 6.3 | 2.2 | 5.8 | 6.1 |
| AMNH A174627              | M | 41.0 | 4.1 | 4.9 | 3.1 | 1.7 | 2.0 | 3.8 | 12.6 | 18.6 | 11.8 | 7.9  | 19.2 | 20.7 | 22.1 | 10.0 | 5.6 | 2.1 | 6.6 | 1.6 | 5.9 | 6.3 |
| UADBA 1409                | M | 39.4 | 3.4 | 4.3 | 3.8 | 1.3 | 1.6 | 4.1 | 14.4 | 17.3 | 12.1 | 8.7  | 21.4 | 23.0 | 23.5 | 11.4 | 6.9 | 2.3 | 6.5 | 1.3 | 6.6 | 7.0 |
| UADBA 1412                | M | 37.0 | 3.6 | 4.4 | 3.6 | 1.6 | 2.1 | 4.3 | 13.0 | 16.7 | 12.1 | 6.9  | 20.2 | 21.0 | 20.5 | 10.2 | 6.3 | 2.3 | 7.4 | 1.6 | 5.5 | 7.0 |
| UADBA 1413                | M | 36.6 | 3.1 | 4.2 | 3.3 | 1.4 | 1.8 | 3.7 | 13.3 | 16.8 | 10.8 | 6.6  | 19.4 | 21.5 | 20.8 | 9.0  | 6.8 | 2.4 | 6.4 | 1.3 | 5.4 | 6.6 |
| UADBA 1414                | M | 40.2 | 4.8 | 5.0 | 3.6 | 2.3 | 1.5 | 4.0 | 14.3 | 17.7 | 11.6 | 8.6  | 20.6 | 22.0 | 21.0 | 10.2 | 7.3 | 3.2 | 8.4 | 1.6 | 6.1 | 6.5 |
| UADBA 3720                | M | 36.0 | 4.0 | 4.7 | 3.5 | 1.6 | 2.0 | 4.0 | 11.4 | 16.0 | 11.3 | 6.6  | 18.9 | 18.5 | 18.8 | 8.1  | 5.7 | 2.0 | 6.0 | 1.2 | 5.2 | 5.9 |
| UADBA 4518                | M | 36.9 | 4.5 | 5.6 | 3.1 | 2.3 | 2.5 | 3.6 | 12.7 | 16.7 | 11.6 | 7.3  | 20.4 | 20.3 | 20.5 | 10.4 | 6.2 | 2.6 | 7.3 | 1.4 | 5.4 | 6.0 |
| UADBA 5728                | M | 35.3 | 4.0 | 4.4 | 2.9 | 1.3 | 2.2 | 3.4 | 12.6 | 15.6 | 11.0 | 6.4  | 17.7 | 18.0 | 17.6 | 8.9  | 4.6 | 2.7 | 6.6 | 1.5 | 4.7 | 5.3 |
| UADBA 7241                | M | 39.0 | 4.3 | 5.3 | 3.5 | 1.9 | 2.4 | 4.3 | 13.6 | 18.0 | 12.4 | 6.8  | 21.3 | 22.0 | 21.0 | 11.2 | 6.3 | 2.0 | 5.6 | 1.6 | 5.7 | 6.4 |
| UADBA 7278                | M | 38.4 | 4.2 | 5.3 | 3.0 | 1.6 | 2.3 | 4.0 | 11.8 | 18.0 | 11.6 | 6.7  | 19.3 | 20.4 | 21.3 | 9.5  | 6.6 | 2.2 | 6.2 | 1.4 | 5.8 | 6.2 |
| UADBA 7515                | M | 40.0 | 4.4 | 5.2 | 3.8 | 1.8 | 2.2 | 4.4 | 14.3 | 19.1 | 12.0 | 8.0  | 20.0 | 21.2 | 22.3 | 10.0 | 6.6 | 2.4 | 5.8 | 1.7 | 5.7 | 6.4 |
| UADBA 7768                | M | 39.0 | 4.4 | 5.6 | 3.3 | 0.4 | 1.6 | 3.8 | 13.6 | 18.2 | 11.8 | 6.6  | 19.5 | 21.1 | 21.2 | 9.6  | 6.2 | 2.3 | 6.5 | 1.4 | 5.6 | 6.6 |
| UADBA 8525                | M | 36.6 | 3.9 | 4.5 | 3.1 | 1.7 | 2.3 | 3.6 | 12.0 | 17.1 | 10.8 | 6.8  | 19.0 | 20.0 | 21.0 | 10.5 | 6.2 | 2.0 | 5.4 | 1.0 | 5.7 | 6.4 |
| UADBA 9252                | M | 38.6 | 4.5 | 5.4 | 3.5 | 1.8 | 2.3 | 4.2 | 13.4 | 17.5 | 12.3 | 7.1  | 20.3 | 21.3 | 21.3 | 8.2  | 7.3 | 2.1 | 6.2 | 1.7 | 5.6 | 6.1 |
| UADBA 9254                | M | 41.6 | 4.2 | 4.8 | 3.5 | 2.1 | 2.2 | 4.2 | 13.2 | 18.0 | 12.8 | 7.5  | 20.0 | 21.3 | 21.7 | 10.0 | 6.5 | 2.2 | 6.8 | 1.8 | 5.2 | 6.1 |
| UADBA 9776                | M | 35.4 | 4.1 | 5.4 | 2.7 | 1.6 | 2.2 | 4.0 | 11.7 | 16.6 | 11.0 | 6.1  | 16.6 | 17.6 | 18.4 | 8.5  | 6.1 | 1.6 | 6.1 | 1.5 | 5.1 | 5.4 |
| UADBA 9781                | M | 36.5 | 3.4 | 3.8 | 3.3 | 2.0 | 1.8 | 3.5 | 12.1 | 15.5 | 11.7 | 6.7  | 18.2 | 18.7 | 19.6 | 8.3  | 5.1 | 2.3 | 6.4 | 1.4 | 5.0 | 6.0 |
| UADBA 9788                | M | 33.8 | 3.8 | 4.8 | 3.0 | 1.1 | 1.5 | 3.4 | 11.4 | 14.1 | 10.8 | 5.7  | 17.3 | 17.8 | 19.3 | 8.6  | 5.5 | 2.2 | 4.5 | 1.0 | 5.3 | 5.8 |
| UADBA 11887               | M | 33.0 | 3.0 | 4.2 | 2.5 | 1.3 | 1.8 | 3.7 | 10.7 | 14.0 | 10.0 | 5.7  | 16.8 | 18.1 | 18.5 | 8.7  | 5.4 | 1.7 | 4.3 | 1.2 | 5.6 | 6.1 |
| UADBA 11890               | M | 41.1 | 5.1 | 5.5 | 3.7 | 1.7 | 2.4 | 4.3 | 14.1 | 18.1 | 12.4 | 7.7  | 20.6 | 21.2 | 22.0 | 10.0 | 7.0 | 2.2 | 6.5 | 1.5 | 5.6 | 6.3 |
| UADBA 11975               | M | 37.8 | 3.2 | 4.5 | 3.7 | 1.7 | 1.9 | 3.0 | 12.7 | 17.3 | 11.3 | 7.2  | 19.7 | 20.4 | 21.3 | 10.6 | 6.6 | 2.2 | 5.8 | 1.7 | 5.4 | 6.6 |
| UADBA 11976               | M | 37.4 | 3.3 | 4.1 | 2.8 | 2.0 | 2.2 | 2.6 | 12.7 | 16.5 | 11.7 | 6.9  | 20.0 | 20.3 | 19.8 | 9.2  | 5.6 | 2.0 | 5.3 | 1.1 | 5.6 | 6.0 |
| UADBA 12308               | M | 35.3 | 3.3 | 3.9 | 2.7 | 2.1 | 1.7 | 2.8 | 12.1 | 16.2 | 10.8 | 7.3  | 19.0 | 20.0 | 20.3 | 10.3 | 5.7 | 2.3 | 5.7 | 1.5 | 5.7 | 6.2 |
| UADBA 12309               | M | 36.4 | 3.8 | 4.5 | 3.2 | 2.2 | 2.2 | 3.1 | 13.0 | 17.8 | 11.7 | 7.1  | 19.7 | 20.7 | 20.0 | 8.8  | 6.6 | 2.5 | 6.3 | 1.7 | 4.6 | 5.8 |
| UADBA 12451               | M | 38.7 | 4.3 | 5.2 | 3.8 | 1.6 | 2.0 | 3.7 | 13.0 | 18.0 | 12.4 | 6.8  | 18.6 | 19.5 | 21.5 | 9.0  | 6.2 | 1.7 | 4.9 | 1.0 | 5.3 | 6.4 |
| UADBA 19658               | M | 39.8 | 4.5 | 5.8 | 4.0 | 1.9 | 2.8 | 4.0 | 14.0 | 19.1 | 12.8 | 7.3  | 21.6 | 22.4 | 22.8 | 10.1 | 7.2 | 2.2 | 6.4 | 1.4 | 5.6 | 6.6 |
| UADBA 19659               | M | 38.4 | 3.8 | 5.0 | 3.4 | 1.5 | 2.3 | 3.7 | 12.5 | 17.5 | 11.6 | 7.5  | 20.2 | 21.6 | 21.0 | 10.0 | 6.3 | 2.0 | 5.6 | 1.2 | 5.9 | 6.0 |
| UADBA 19660               | M | 42.4 | 5.0 | 5.8 | 3.9 | 1.7 | 2.6 | 3.9 | 15.2 | 19.0 | 13.4 | 7.9  | 20.9 | 22.0 | 23.5 | 10.0 | 7.0 | 2.3 | 6.7 | 1.6 | 6.0 | 6.8 |
| UADBA 19661               | M | 39.0 | 4.2 | 4.8 | 3.5 | 1.5 | 2.3 | 3.4 | 12.6 | 17.7 | 12.1 | 8.0  | 20.3 | 21.5 | 22.7 | 10.1 | 6.8 | 2.3 | 6.2 | 1.4 | 5.7 | 6.3 |

|             |   |      |     |     |     |     |     |     |      |      |      |     |      |      |      |      |     |     |     |     |     |     |
|-------------|---|------|-----|-----|-----|-----|-----|-----|------|------|------|-----|------|------|------|------|-----|-----|-----|-----|-----|-----|
| UADBA 19662 | M | 37.5 | 4.2 | 4.8 | 3.4 | 1.8 | 2.4 | 3.6 | 12.5 | 18.0 | 11.4 | 7.5 | 19.8 | 20.8 | 21.2 | 9.5  | 6.0 | 1.8 | 5.4 | 1.5 | 5.6 | 6.3 |
| UADBA 19671 | M | 35.8 | 3.4 | 4.6 | 3.2 | 1.9 | 1.8 | 3.3 | 11.0 | 16.0 | 11.0 | 6.4 | 19.0 | 19.8 | 21.2 | 9.0  | 5.6 | 2.0 | 5.6 | 1.4 | 5.0 | 5.8 |
| UADBA19672  | M | 38.8 | 4.2 | 5.1 | 3.6 | 1.5 | 2.2 | 3.8 | 13.7 | 18.4 | 11.6 | 7.4 | 20.5 | 21.6 | 21.4 | 10.4 | 6.9 | 2.5 | 6.6 | 1.4 | 5.4 | 6.0 |
| UADBA 19673 | M | 38.9 | 4.2 | 5.9 | 3.4 | 1.0 | 2.6 | 3.6 | 13.1 | 18.4 | 12.3 | 7.8 | 20.7 | 21.8 | 22.6 | 10.4 | 6.5 | 2.3 | 6.2 | 1.4 | 6.2 | 6.9 |
| UADBA 19674 | M | 39.7 | 4.7 | 5.8 | 3.6 | 1.7 | 1.0 | 3.6 | 14.2 | 18.1 | 11.7 | 7.6 | 19.2 | 21.3 | 21.4 | 9.3  | 6.8 | 2.3 | 7.0 | 1.8 | 6.0 | 6.6 |
| UADBA19679  | M | 43.4 | 4.1 | 5.6 | 3.6 | 1.9 | 2.1 | 3.7 | 13.3 | 19.3 | 12.7 | 6.6 | 20.0 | 20.7 | 22.2 | 11.0 | 6.8 | 2.2 | 6.2 | 1.3 | 5.6 | 6.4 |
| UADBA 19886 | M | 34.6 | 3.3 | 4.4 | 3.4 | 1.4 | 2.0 | 3.5 | 11.9 | 15.5 | 11.3 | 6.4 | 17.4 | 18.7 | 19.1 | 11.0 | 5.6 | 1.7 | 4.9 | 1.0 | 5.4 | 6.4 |
| UADBA 20478 | M | 37.8 | 3.6 | 4.1 | 2.9 | 1.4 | 2.1 | 3.0 | 11.8 | 16.6 | 11.2 | 7.4 | 19.1 | 19.8 | 20.8 | 10.3 | 6.1 | 2.0 | 5.6 | 1.4 | 5.3 | 6.6 |
| UADBA 26249 | M | 38.3 | 4.1 | 4.4 | 3.0 | 1.6 | 2.2 | 3.0 | 11.6 | 16.6 | 11.9 | 6.5 | 18.7 | 19.8 | 22.4 | 9.4  | 6.2 | 2.2 | 5.8 | 1.3 | 5.7 | 6.5 |
| UADBA 26250 | M | 38.6 | 3.8 | 4.1 | 2.9 | 1.2 | 1.0 | 3.5 | 12.2 | 16.9 | 12.2 | 7.5 | 20.0 | 21.7 | 21.8 | 9.3  | 6.5 | 2.0 | 6.2 | 1.2 | 5.0 | 5.8 |
| UADBA 26251 | M | 39.4 | 4.0 | 5.0 | 4.0 | 1.6 | 2.7 | 3.1 | 13.5 | 17.9 | 12.8 | 7.4 | 18.6 | 22.1 | 23.0 | 10.4 | 6.6 | 2.4 | 7.0 | 2.1 | 5.6 | 6.9 |
| UADBA 26252 | M | 36.8 | 4.3 | 5.2 | 3.4 | 1.8 | 2.2 | 4.0 | 12.3 | 16.7 | 11.3 | 6.7 | 17.2 | 19.4 | 20.6 | 9.0  | 6.4 | 2.0 | 6.3 | 1.5 | 5.2 | 5.8 |
| UADBA 26255 | M | 36.0 | 3.8 | 4.4 | 2.8 | 1.6 | 2.6 | 4.2 | 11.9 | 15.3 | 10.2 | 6.2 | 16.6 | 17.8 | 18.2 | 8.4  | 6.2 | 2.0 | 5.2 | 1.3 | 5.0 | 5.6 |
| UADBA 26257 | M | 33.6 | 3.6 | 4.0 | 3.3 | 1.7 | 1.8 | 3.8 | 11.8 | 15.8 | 11.0 | 6.3 | 18.5 | 19.5 | 18.3 | 7.2  | 5.8 | 1.9 | 6.2 | 1.4 | 4.5 | 5.5 |
| UADBA 26258 | M | 38.6 | 4.8 | 4.8 | 3.3 | 2.5 | 2.2 | 3.4 | 12.5 | 17.7 | 11.4 | 7.2 | 18.7 | 18.6 | 20.0 | 9.6  | 6.4 | 2.3 | 8.0 | 1.9 | 4.9 | 6.2 |
| UADBA 26259 | M | 36.0 | 4.0 | 5.0 | 3.2 | 1.6 | 2.4 | 3.8 | 12.6 | 16.6 | 10.0 | 5.9 | 15.8 | 17.6 | 19.0 | 8.2  | 6.8 | 2.0 | 5.4 | 1.2 | 5.2 | 5.4 |
| UADBA 26260 | M | 34.9 | 3.5 | 5.1 | 2.8 | 1.8 | 2.3 | 4.1 | 12.1 | 15.0 | 10.8 | 6.8 | 17.3 | 18.1 | 18.7 | 9.9  | 5.5 | 2.2 | 8.0 | 1.4 | 4.7 | 6.2 |
| UADBA 26261 | M | 35.8 | 3.8 | 4.3 | 3.0 | 1.8 | 2.2 | 3.0 | 12.0 | 17.2 | 10.1 | 5.6 | 17.3 | 17.0 | 17.7 | 8.4  | 5.6 | 2.1 | 6.3 | 1.1 | 4.8 | 5.3 |
| UADBA 26262 | M | 36.5 | 4.3 | 4.5 | 3.3 | 1.8 | 2.4 | 3.2 | 12.5 | 17.0 | 12.0 | 5.9 | 18.2 | 18.5 | 21.3 | 8.9  | 5.9 | 2.0 | 5.7 | 1.4 | 5.7 | 6.1 |
| UADBA 26263 | M | 39.6 | 4.1 | 5.0 | 3.0 | 2.0 | 2.0 | 3.0 | 13.2 | 18.4 | 11.6 | 6.6 | 20.1 | 20.2 | 21.1 | 9.2  | 6.0 | 2.3 | 6.4 | 1.5 | 5.6 | 6.0 |
| UADBA 26264 | M | 36.4 | 3.6 | 4.7 | 3.1 | 1.4 | 2.6 | 3.3 | 12.6 | 16.5 | 12.1 | 7.2 | 20.1 | 21.5 | 21.8 | 9.7  | 6.3 | 2.3 | 6.2 | 1.5 | 5.6 | 6.1 |
| UADBA 26265 | M | 39.4 | 4.3 | 5.4 | 3.7 | 1.9 | 2.1 | 3.3 | 13.4 | 17.3 | 11.9 | 7.5 | 21.6 | 21.8 | 21.7 | 10.6 | 6.6 | 2.2 | 6.3 | 1.5 | 5.6 | 6.5 |
| UADBA 26267 | M | 36.5 | 4.1 | 5.4 | 3.5 | 1.7 | 2.4 | 4.1 | 13.0 | 17.2 | 11.3 | 7.4 | 19.8 | 20.8 | 20.6 | 11.5 | 6.6 | 2.4 | 6.3 | 1.4 | 5.5 | 6.1 |
| UADBA 26268 | M | 40.2 | 4.0 | 5.4 | 3.6 | 1.8 | 2.4 | 3.8 | 13.2 | 18.7 | 12.6 | 6.4 | 21.7 | 22.4 | 22.5 | 10.1 | 6.4 | 2.2 | 5.8 | 1.5 | 6.0 | 6.7 |
| UADBA 26269 | M | 36.6 | 3.6 | 4.3 | 3.1 | 1.9 | 2.4 | 3.4 | 12.6 | 17.3 | 12.4 | 7.2 | 20.3 | 20.5 | 21.2 | 8.8  | 6.1 | 2.2 | 5.5 | 1.3 | 5.6 | 6.3 |
| UADBA 26270 | M | 37.5 | 3.8 | 4.5 | 3.1 | 1.7 | 2.5 | 3.8 | 13.1 | 17.3 | 12.9 | 7.6 | 21.4 | 21.4 | 23.8 | 10.1 | 5.8 | 2.1 | 5.6 | 1.3 | 6.1 | 6.7 |
| UADBA 26375 | M | 38.6 | 4.5 | 5.3 | 4.1 | 2.0 | 2.4 | 3.6 | 13.1 | 18.2 | 12.7 | 6.7 | 20.2 | 21.8 | 23.1 | 9.8  | 6.9 | 2.1 | 6.1 | 1.5 | 5.7 | 7.0 |
| UADBA 26376 | M | 37.2 | 4.0 | 5.0 | 3.1 | 1.6 | 1.9 | 3.1 | 11.6 | 16.6 | 10.8 | 6.0 | 15.8 | 18.6 | 19.3 | 9.3  | 5.6 | 1.8 | 5.1 | 1.3 | 4.8 | 5.6 |
| UADBA 26402 | M | 40.4 | 4.1 | 5.7 | 3.1 | 2.1 | 2.3 | 3.3 | 13.6 | 17.0 | 12.2 | 6.9 | 21.2 | 21.8 | 23.2 | 8.8  | 6.8 | 2.2 | 6.5 | 1.7 | 5.7 | 6.8 |

<sup>a</sup>Lectotype

<sup>b</sup> ID Molecular

**Table S3.** Measurements data for *Mantidactylus ambreensis*. All measurements in mm. F: female, M: male, J: juvenile, Sa: subadult.

| Specimen                   | Sexes | SVL  | TD  | ED  | EN  | EST | NS  | NN  | HW   | HL   | HDL  | RC  | FE   | TI   | FT   | TA   | EO  | EM  | EHEAD | T1  | TO3 | TO5 |
|----------------------------|-------|------|-----|-----|-----|-----|-----|-----|------|------|------|-----|------|------|------|------|-----|-----|-------|-----|-----|-----|
| AMNH A50521                | J     | 12   | 2.4 | 3.4 | 1.7 | 0.9 | 1.1 | 2.7 | ⊙    | 8.7  | 27.4 | ⊙   | ⊙    | 14.5 | 16.2 | ⊙    | 7.8 | ⊙   | 5.4   | 1.4 | 4   | 4.3 |
| UADBA 7223                 | J     | 23.7 | ⊙   | ⊙   | ⊙   | ⊙   | ⊙   | ⊙   | ⊙    | ⊙    | ⊙    | ⊙   | ⊙    | ⊙    | ⊙    | ⊙    | ⊙   | ⊙   | ⊙     | ⊙   | ⊙   | ⊙   |
| UADBA 8414                 | SA    | 31.4 | 3.1 | 4.0 | 2.9 | 1.8 | 1.7 | 3.0 | 10.8 | 12.6 | 9.6  | 6.8 | 15.6 | 18.8 | 17.4 | 7.7  | 5.5 | 1.6 | 4.7   | 1.2 | 4.4 | 5.3 |
| MNHN 1893.241 <sup>a</sup> | F     | 42.2 | 3.4 | 4.6 | 3.3 | -   | 1.5 | 3.2 | 12.3 | 14.4 | 11.7 | ⊙   | ⊙    | ⊙    | 20.0 | ⊙    | ⊙   | ⊙   | ⊙     | ⊙   | ⊙   | ⊙   |
| UADBA 5650                 | F     | 39.0 | 3.6 | 5.3 | 3.5 | 1.7 | 2.6 | 3.7 | 13.0 | 16.7 | 12.0 | 7.2 | 19.3 | 19.8 | 19.3 | 11.1 | 7.0 | 2.4 | 5.7   | 1.3 | 4.8 | 5.4 |
| UADBA 8394                 | F     | 40.5 | 3.7 | 5.5 | 3.3 | 1.9 | 2.5 | 3.8 | 13.8 | 16.4 | 12.6 | 8.0 | 20.5 | 23.5 | 21.3 | 10.3 | 7.0 | 2.1 | 6.3   | 1.2 | 4.7 | 5.4 |
| UADBA 8396                 | F     | 38.4 | 2.8 | 5.3 | 3.0 | 1.7 | 2.0 | 3.4 | 11.7 | 15.4 | 10.4 | 7.7 | 19.0 | 20.6 | 19.0 | 9.9  | 6.2 | 1.7 | 5.5   | 1.6 | 4.7 | 5.9 |
| UADBA 8398                 | F     | 38.2 | 2.7 | 4.5 | 2.8 | 1.6 | 2.7 | 3.4 | 12.0 | 15.0 | 12.8 | 8.6 | 19.3 | 22.8 | 20.5 | 11.5 | 6.6 | 1.8 | 5.5   | 1.4 | 4.9 | 5.8 |
| UADBA 8399                 | F     | 39.1 | 2.7 | 5.0 | 3.5 | 1.4 | 2.1 | 3.3 | 11.6 | 14.0 | 13.0 | 7.0 | 18.6 | 20.5 | 20.3 | 10.2 | 6.1 | 1.9 | 5.4   | 1.5 | 5.0 | 6.2 |
| UADBA 8401                 | F     | 38.3 | 3.3 | 5.3 | 3.3 | 1.9 | 2.4 | 4.0 | 11.9 | 15.7 | 11.6 | 7.8 | 19.1 | 21.2 | 18.4 | 10.0 | 7.1 | 2.1 | 6.0   | 1.8 | 5.0 | 6.3 |
| UADBA 8412                 | F     | 42.0 | 3.0 | 5.4 | 3.0 | 1.6 | 2.0 | 3.4 | 13.4 | 16.4 | 11.4 | 7.6 | 19.4 | 22.1 | 20.6 | 9.8  | 6.9 | 2.2 | 5.9   | 1.4 | 4.7 | 5.4 |
| UADBA 9056                 | F     | 39.7 | 3.6 | 5.7 | 3.8 | 1.5 | 1.9 | 3.4 | 13.2 | 14.8 | 10.6 | 8.2 | 19.5 | 20.2 | 19.3 | 10.7 | 7.5 | 2.6 | 6.0   | 1.3 | 4.9 | 5.5 |
| UADBA 9057                 | F     | 41.6 | 3.4 | 5.0 | 3.6 | 1.9 | 2.4 | 3.7 | 13.7 | 16.4 | 12.2 | 7.3 | 20.6 | 20.9 | 21.6 | 9.7  | 7.5 | 2.3 | 7.2   | 1.3 | 6.0 | 6.6 |
| AMNH A167482 <sup>b</sup>  | M     | 38.1 | 5.1 | 4.4 | 2.8 | 1.6 | 1.9 | 3.1 | 12.0 | 16.6 | 11.2 | 6.2 | 17.9 | 19.7 | 19.5 | 9.2  | 6.5 | 2.3 | 5.6   | 1.7 | 5.1 | 5.8 |
| AMNH A167485               | M     | 35.0 | 4.4 | 5.0 | 2.5 | 1.9 | 1.5 | 2.9 | 11.0 | 15.9 | 10.0 | 6.3 | 17.4 | 18.5 | 18.0 | 8.3  | 6.3 | 1.9 | 5.5   | 1.4 | 4.4 | 5.1 |
| AMNH A167486               | M     | 34.7 | 5.0 | 4.5 | 2.8 | 1.5 | 1.1 | 2.8 | 9.9  | 15.2 | 10.0 | 6.1 | 17.7 | 18.7 | 18.0 | 8.6  | 5.8 | 1.8 | 5.0   | 1.1 | 4.5 | 5.2 |
| AMNH A167501 <sup>b</sup>  | M     | 33.4 | 4.4 | 4.2 | 2.5 | 1.8 | 2.2 | 2.5 | 10.6 | 15.6 | 9.0  | 6.1 | 16.2 | 17.6 | 16.7 | 8.7  | 6.0 | 1.9 | 5.3   | 1.0 | 4.0 | 4.9 |
| AMNH A 167504              | M     | 34.6 | 5.0 | 5.0 | 3.0 | 1.6 | 1.5 | 3.2 | 11.6 | 16.0 | 11.7 | 6.1 | 17.6 | 19.0 | 19.7 | 8.1  | 6.2 | 2.4 | 5.6   | 1.5 | 5.1 | 6.0 |
| UADBA 3714                 | M     | 35.0 | 4.2 | 4.2 | 2.8 | 1.0 | 1.8 | 3.7 | 11.5 | 14.8 | 10.7 | 7.2 | 17.6 | 18.8 | 19.8 | 8.4  | 5.8 | 1.8 | 5.6   | 1.4 | 5.1 | 5.8 |
| UADBA 5647                 | M     | 35.1 | 5.0 | 4.6 | 3.0 | 1.5 | 1.3 | 3.1 | 10.8 | 14.7 | 10.1 | 6.7 | 17.0 | 19.0 | 17.2 | 9.2  | 6.4 | 1.7 | 5.2   | 1.4 | 4.1 | 4.7 |
| UADBA 5648                 | M     | 35.6 | 4.7 | 4.4 | 3.1 | 1.9 | 2.6 | 3.4 | 11.7 | 15.6 | 10.7 | 6.4 | 17.5 | 18.0 | 17.8 | 8.4  | 6.9 | 1.8 | 5.1   | 1.4 | 4.6 | 5.3 |
| UADBA5649                  | M     | 36.0 | 5.0 | 5.0 | 3.7 | 1.8 | 2.6 | 3.5 | 11.7 | 15.4 | 11.0 | 6.8 | 16.5 | 17.6 | 17.8 | 9.0  | 7.0 | 1.8 | 5.2   | 1.4 | 4.7 | 5.3 |
| UADBA 7222                 | M     | 33.8 | 4.0 | 5.0 | 2.5 | 1.6 | 2.3 | 3.7 | 10.4 | 13.8 | 10.2 | 6.3 | 16.2 | 17.9 | 16.9 | 9.0  | 5.2 | 1.8 | 5.2   | 1.2 | 4.6 | 5.4 |
| UADBA7224                  | M     | 37.0 | 4.2 | 5.3 | 3.2 | 1.6 | 2.0 | 3.3 | 11.4 | 16.0 | 10.3 | 6.8 | 17.9 | 19.7 | 18.2 | 10.5 | 5.1 | 2.1 | 5.5   | 1.4 | 4.5 | 5.4 |
| UADBA 8393                 | M     | 39.0 | 4.8 | 4.6 | 3.4 | 2.0 | 1.7 | 3.4 | 12.4 | 17.1 | 12.0 | 6.8 | 19.8 | 20.4 | 20.1 | 8.7  | 7.0 | 2.3 | 5.8   | 1.8 | 4.9 | 5.8 |
| UADBA 8395                 | M     | 35.2 | 5.4 | 5.1 | 3.0 | 1.4 | 1.8 | 3.3 | 11.7 | 16.0 | 9.6  | 7.0 | 17.2 | 18.5 | 18.0 | 9.0  | 6.7 | 2.1 | 5.3   | 1.2 | 4.7 | 5.8 |
| UADBA 8408                 | M     | 33.4 | 5.1 | 4.4 | 2.3 | 1.6 | 1.8 | 3.3 | 10.0 | 14.8 | 9.8  | 5.8 | 15.4 | 17.1 | 16.1 | 7.9  | 5.9 | 1.6 | 4.8   | 1.4 | 4.3 | 4.8 |
| UADBA 8410                 | M     | 33.6 | 5.2 | 4.5 | 2.7 | 1.6 | 2.0 | 3.3 | 10.7 | 14.8 | 10.3 | 7.1 | 16.3 | 18.8 | 17.2 | 9.4  | 5.6 | 1.8 | 4.5   | 1.1 | 4.4 | 5.1 |
| UADBA 8411                 | M     | 35.8 | 4.6 | 4.8 | 3.1 | 1.5 | 1.8 | 3.4 | 11.7 | 15.1 | 10.3 | 6.7 | 17.0 | 19.2 | 16.5 | 10.0 | 6.6 | 1.9 | 5.6   | 1.8 | 4.2 | 5.0 |
| UADBA 8413                 | M     | 36.7 | 4.3 | 4.7 | 3.3 | 1.5 | 2.0 | 3.4 | 11.8 | 17.1 | 11.3 | 6.8 | 18.6 | 20.5 | 19.2 | 10.6 | 6.6 | 2.2 | 5.5   | 1.4 | 5.0 | 6.0 |

|             |   |      |     |     |     |     |     |     |      |      |      |     |      |      |      |      |     |     |     |     |     |     |
|-------------|---|------|-----|-----|-----|-----|-----|-----|------|------|------|-----|------|------|------|------|-----|-----|-----|-----|-----|-----|
| UADBA 8416  | M | 35.3 | 4.1 | 4.4 | 3.2 | 2.1 | 2.0 | 3.3 | 11.0 | 15.6 | 11.6 | 7.9 | 17.3 | 19.3 | 20.0 | 10.5 | 6.3 | 1.9 | 5.3 | 1.6 | 5.1 | 5.9 |
| UADBA 26222 | M | 35.3 | 5.4 | 5.0 | 3.1 | 1.8 | 2.4 | 3.8 | 11.6 | 16.4 | 10.3 | 5.5 | 16.4 | 18.1 | 17.3 | 8.0  | 6.3 | 2.0 | 4.8 | 1.3 | 4.0 | 4.9 |
| UADBA 26223 | M | 38.4 | 5.9 | 5.3 | 3.7 | 1.6 | 2.6 | 3.6 | 12.0 | 17.4 | 12.0 | 6.8 | 18.5 | 18.4 | 19.0 | 8.1  | 6.8 | 1.9 | 5.4 | 1.3 | 4.4 | 5.6 |
| UADBA 26224 | M | 34.2 | 5.1 | 5.0 | 4.0 | 1.6 | 2.2 | 3.7 | 11.4 | 15.5 | 11.6 | 7.3 | 18.0 | 19.5 | 19.3 | 8.7  | 6.4 | 1.7 | 4.8 | 1.1 | 4.4 | 5.3 |
| UADBA 26399 | M | 35.1 | 3.4 | 4.4 | 3.2 | 1.3 | 2.0 | 3.7 | 11.9 | 15.6 | 10.8 | 6.9 | 16.6 | 21.3 | 20.2 | 9.5  | 5.7 | 2.2 | 6.4 | 1.4 | 5.2 | 6.3 |
| UADBA 26400 | M | 33.3 | 3.3 | 4.3 | 2.8 | 1.1 | 1.6 | 3.6 | 11.6 | 14.5 | 11.7 | 7.0 | 18.6 | 18.7 | 19.4 | 8.3  | 5.2 | 1.8 | 5.5 | 1.2 | 5.3 | 5.8 |
| UADBA 26401 | M | 36.7 | 3.6 | 4.6 | 3.3 | 1.4 | 2.5 | 4.5 | 12.4 | 16.6 | 12.0 | 7.0 | 17.6 | 17.3 | 17.9 | 8.5  | 6.1 | 2.4 | 6.0 | 1.5 | 5.1 | 5.7 |
| UADBA 39003 | M | 35.4 | 3.3 | 4.6 | 3.1 | 1.3 | 2.0 | 3.8 | 11.6 | 15.1 | 11.1 | 6.8 | 17.7 | 19.6 | 20.6 | 8.7  | 5.2 | 2.0 | 5.9 | 1.2 | 5.7 | 6.1 |

<sup>a</sup>Holotype

<sup>b</sup>ID molecular

**Table S4.** Measurement data for *Mantidactylus ambonyi*. All measurements in mm. F: female, M: male, J: juvenile, SA: subadult

| Specimen     | Sexes | SVL  | TD  | ED  | EN  | EST | NS  | NN  | HW   | HL   | HDL  | RC  | FE   | TI   | FT   | TA   | EO  | EM  | EHEAD | T1  | TO3 | TO5 |
|--------------|-------|------|-----|-----|-----|-----|-----|-----|------|------|------|-----|------|------|------|------|-----|-----|-------|-----|-----|-----|
| UADBA 7226   | SA    | 30.3 | 3.4 | 4.8 | 3.2 | 1.7 | 2.0 | 3.6 | 11.4 | 14.5 | 10.2 | 6.9 | 17.6 | 19.9 | 18.0 | 9.0  | 6.7 | 1.9 | 5.3   | 1.4 | 4.4 | 5.2 |
| UADBA 7225   | F     | 35.3 | 2.2 | 4.0 | 3.6 | 1.5 | 2.0 | 3.6 | 11.3 | 14.8 | 10.7 | 6.3 | 18.3 | 19.3 | 19.0 | 9.0  | 6.4 | 2.0 | 5.0   | 1.3 | 4.8 | 5.2 |
| UADBA 9058   | F     | 34.0 | 2.9 | 4.9 | 3.1 | 1.4 | 1.1 | 3.1 | 11.8 | 13.0 | 9.7  | 7.3 | 18.0 | 19.3 | 18.5 | 9.6  | 6.1 | 2.2 | 5.6   | 1.2 | 5.2 | 5.5 |
| AMNH A167487 | F     | 36.8 | 2.9 | 4.2 | 2.4 | 1.6 | 1.9 | 3.1 | 10.7 | 14.1 | 11.6 | 6.3 | 19.0 | 20.3 | 19.7 | 8.7  | 6.3 | 2.0 | 5.3   | 1.2 | 5.3 | 6.0 |
| AMNH A167491 | F     | 37.1 | 3.3 | 4.1 | 2.1 | 1.3 | 1.5 | 3.4 | 11.2 | 15.0 | 11.7 | 7.8 | 18.7 | 21.1 | 19.0 | 9.5  | 5.6 | 2.0 | 5.3   | 1.7 | 5.5 | 6.1 |
| AMNH A167493 | F     | 37.9 | 2.7 | 4.3 | 2.7 | 1.9 | 1.6 | 3.3 | 10.8 | 13.8 | 11.0 | 7.4 | 19.4 | 21.5 | 20.3 | 9.8  | 5.6 | 2.3 | 5.6   | 1.2 | 5.0 | 5.6 |
| AMNH A167494 | F     | 37.7 | 3.1 | 4.1 | 2.7 | 1.8 | 1.8 | 2.9 | 11.5 | 15.5 | 10.4 | 7.7 | 20.2 | 20.8 | 18.8 | 10.1 | 6.4 | 2.4 | 5.2   | 1.1 | 5.1 | 6.1 |
| AMNH A167495 | F     | 36.7 | 2.7 | 4.5 | 2.5 | 1.6 | 1.8 | 3.4 | 10.6 | 13.4 | 10.7 | 7.6 | 19.0 | 20.3 | 18.7 | 9.0  | 6.0 | 1.9 | 5.0   | 1.3 | 5.1 | 5.3 |
| AMNH A167498 | F     | 37.2 | 3.3 | 4.5 | 2.6 | 1.8 | 2.0 | 3.4 | 11.4 | 15.1 | 10.7 | 6.4 | 19.2 | 20.1 | 19.8 | 9.1  | 5.6 | 2.0 | 5.3   | 1.2 | 5.1 | 6.4 |
| AMNH A167490 | M     | 30.0 | 4.4 | 3.8 | 2.3 | 1.5 | 1.6 | 2.6 | 9.4  | 13.1 | 9.2  | 5.7 | 16.0 | 16.3 | 15.5 | 7.8  | 5.2 | 1.8 | 4.8   | 1.1 | 4.1 | 4.7 |
| AMNH A167492 | M     | 31.3 | 4.7 | 3.5 | 2.6 | 1.5 | 1.5 | 2.8 | 9.0  | 14.6 | 8.6  | 6.0 | 15.1 | 16.7 | 16.3 | 7.6  | 5.1 | 1.7 | 4.4   | 0.8 | 4.4 | 5.0 |
| AMNH A167497 | M     | 31.0 | 4.9 | 3.8 | 2.3 | 1.3 | 1.5 | 2.6 | 9.4  | 13.5 | 9.5  | 5.6 | 15.4 | 17.2 | 16.8 | 7.8  | 5.3 | 1.9 | 5.0   | 1.1 | 4.6 | 5.4 |
| UADBA 5726   | M     | 30.6 | 4.0 | 4.3 | 2.4 | 1.2 | 1.4 | 3.0 | 10.5 | 12.8 | 9.8  | 5.6 | 15.4 | 17.1 | 15.5 | 7.0  | 4.6 | 1.8 | 4.4   | 1.2 | 4.5 | 4.9 |
| UADBA 8406   | M     | 31.8 | 5.0 | 4.2 | 2.8 | 1.7 | 2.0 | 3.3 | 11.0 | 14.8 | 9.9  | 6.2 | 14.4 | 16.0 | 15.3 | 8.0  | 5.7 | 1.6 | 4.5   | 1.4 | 3.7 | 4.3 |

**Table S5.** Measurement data for *Mantidactylus mocquardi*. All measurements in mm. F: female, M: male, J: juvenile, SA: subadult

| Specimen     | Sexes | SVL  | TD  | ED  | EN  | EST | NS  | NN  | HW   | HL   | HDL  | RC  | FE   | TI   | FT   | TA   | EO  | EM  | EHEAD | T1  | TO3 | TO5 |
|--------------|-------|------|-----|-----|-----|-----|-----|-----|------|------|------|-----|------|------|------|------|-----|-----|-------|-----|-----|-----|
| AMNH A157111 | F     | 46.0 | 2.6 | 5.7 | 3.9 | 2.2 | 2.3 | 3.9 | 16.6 | 20.4 | 14.4 | 9.3 | 24.2 | 24.0 | 24.5 | 9.5  | 8.4 | 2.9 | 6.8   | ⊙   | 5.5 | 6.5 |
| AMNH A157113 | F     | 51.4 | 3.1 | 8.0 | 4.5 | 2.6 | 2.2 | 4.7 | 17.5 | 23.0 | 15.4 | 9.9 | 26.1 | 26.9 | 26.6 | 11.2 | 8.9 | 3.6 | 8.6   | 2.5 | 6.5 | 8.0 |
| AMNH A157116 | F     | 51.0 | 3.6 | 7.2 | 4.4 | 2.3 | 1.9 | 4.8 | 16.8 | 21.6 | 14.4 | 9.6 | 26.7 | 25.8 | 25.1 | 10.2 | 8.6 | 3.2 | 7.9   | 2.3 | 6.4 | 7.5 |

|                           |   |      |     |     |     |      |     |     |      |      |      |      |      |      |      |      |      |     |      |     |     |      |
|---------------------------|---|------|-----|-----|-----|------|-----|-----|------|------|------|------|------|------|------|------|------|-----|------|-----|-----|------|
| AMNH A157119              | F | 50.9 | 2.9 | 6.6 | 4.2 | 2.0  | 2.5 | 4.1 | 16.5 | 21.5 | 13.4 | 8.6  | 25.7 | 25.3 | 24.3 | 9.9  | 8.3  | 2.7 | 7.1  | 1.6 | 7.3 | 7.8  |
| AMNH A167583              | F | 51.9 | 3.6 | 6.4 | 4.5 | 3.3  | 2.7 | 3.6 | 18.1 | 23.1 | 15.3 | 9.7  | 28.8 | 26.9 | 25.0 | 11.6 | 9.0  | 3.4 | 8.6  | 2.2 | 6.5 | 7.7  |
| AMNH A167587 <sup>b</sup> | F | 51.8 | 3.7 | 6.4 | 4.5 | 2.8  | 2.7 | 3.9 | 17.2 | 22.1 | 15.2 | 9.4  | 26.0 | 25.6 | 25.0 | 10.3 | 9.5  | 3.2 | 7.7  | 2.4 | 6.1 | 7.0  |
| AMNH A 167589             | F | 52.4 | 4.3 | 6.4 | 4.8 | 2.05 | 2.0 | 4.8 | 18.4 | 21.6 | 15.3 | 9.2  | 28.2 | 26   | 27.7 | 10.6 | 9.6  | 3.8 | 8.6  | 2.7 | 7.2 | 8.5  |
| AMNH A174621 <sup>b</sup> | F | 51.1 | 3.3 | 8.0 | 4.8 | 2.4  | 2.5 | 5.7 | 18.1 | 22.7 | 15.4 | 9.4  | 26.8 | 26.7 | 26.0 | 10.5 | 9.3  | 3.3 | 7.7  | 2.3 | 6.8 | 7.8  |
| UADBA7229                 | F | 64.3 | 5.2 | 8.8 | 5.6 | 1.3  | 2.5 | 6.6 | 23.4 | 26.7 | 19.6 | 12.0 | 33.1 | 35.4 | 33.7 | 14.6 | 11.9 | 4.3 | 10.8 | 2.5 | 8.8 | 10.4 |
| UADBA7765                 | F | 50.9 | 3.5 | 6.4 | 4.7 | 2.6  | 3.0 | 5.0 | 17.3 | 22.5 | 15.3 | 9.1  | 27.0 | 26.5 | 25.2 | 11.0 | 9.0  | 2.8 | 7.1  | 2.2 | 6.9 | 7.5  |
| UADBA7767                 | F | 51.8 | 3.6 | 8.6 | 4.5 | 3.1  | 3.5 | 5.6 | 18.3 | 23.8 | 14.8 | 8.9  | 27.5 | 27.1 | 25.4 | 12.2 | 7.6  | 2.8 | 7.9  | 1.7 | 6.2 | 7.1  |
| UADBA7769                 | F | 49.9 | 3.3 | 6.8 | 4.2 | 2.8  | 3.5 | 4.5 | 17.6 | 20.9 | 14.5 | 8.5  | 25.4 | 24.9 | 23.1 | 11.0 | 9.6  | 3.2 | 7.8  | 1.8 | 6.5 | 7.1  |
| UADBA7772                 | F | 49.0 | 3.2 | 7.0 | 3.7 | 2.4  | 3.0 | 3.0 | 16.8 | 22.2 | 14.0 | 9.2  | 25.4 | 25.4 | 25.4 | 11.1 | 8.0  | 2.5 | 6.9  | 2.3 | 5.9 | 7.4  |
| UADBA7773                 | F | 50.6 | 3.0 | 6.7 | 4.5 | 2.6  | 3.0 | 4.1 | 16.9 | 21.5 | 16.3 | 9.1  | 26.6 | 27.2 | 27.0 | 11.0 | 7.5  | 2.8 | 8.1  | 2.1 | 6.1 | 7.7  |
| UADBA7777                 | F | 47.5 | 3.1 | 6.9 | 4.2 | 2.7  | 2.8 | 4.6 | 15.8 | 20.6 | 13.0 | 9.0  | 24.4 | 25.2 | 24.8 | 10.2 | 7.8  | 2.6 | 6.9  | 2.0 | 6.1 | 6.9  |
| UADBA 8118                | F | 50.0 | 3.7 | 7.0 | 4.2 | 2.3  | 3.6 | 5.0 | 17.7 | 22.6 | 14.6 | 9.5  | 26.1 | 25.5 | 24.3 | 11.0 | 8.4  | 2.5 | 7.5  | 2.4 | 6.9 | 7.4  |
| UADBA8119                 | F | 52.5 | 3.4 | 6.7 | 4.3 | 2.1  | 3.3 | 5.0 | 17.9 | 22.4 | 15.1 | 9.0  | 27.7 | 27.6 | 26.2 | 10.6 | 8.4  | 2.6 | 7.7  | 2.0 | 6.9 | 7.8  |
| UADBA8124                 | F | 61.8 | 4.3 | 7.9 | 5.3 | 3.0  | 4.3 | 6.4 | 22.5 | 28.4 | 19.0 | 11.1 | 31.6 | 31.5 | 31.5 | 13.1 | 9.0  | 4.0 | 10.2 | 2.5 | 7.6 | 8.8  |
| UADBA 12312               | F | 56.0 | 4.0 | 6.6 | 4.9 | 2.8  | 2.8 | 5.0 | 18.0 | 25.0 | 16.0 | 10.0 | 27.2 | 28.1 | 28.2 | 11.9 | 9.6  | 3.4 | 8.4  | 2.1 | 6.8 | 8.4  |
| UADBA 12313               | F | 52.8 | 4.0 | 7.0 | 4.7 | 3.1  | 3.8 | 5.4 | 18.6 | 24.3 | 15.2 | 11.0 | 29.6 | 29.3 | 29.4 | 12.8 | 9.3  | 3.0 | 8.4  | 2.5 | 8.3 | 9.3  |
| UADBA 12315               | F | 55.6 | 4.3 | 7.7 | 5.0 | 2.8  | 3.6 | 5.3 | 19.0 | 24.9 | 16.0 | 9.6  | 29.1 | 29.0 | 28.0 | 11.5 | 8.8  | 3.3 | 8.4  | 2.7 | 7.5 | 8.3  |
| UADBA 19603               | F | 48.8 | 3.9 | 6.4 | 3.7 | 2.5  | 2.4 | 4.0 | 16.8 | 20.8 | 11.4 | 9.7  | 24.8 | 25.3 | 25.1 | 11.4 | 8.4  | 3.0 | 7.4  | 2.3 | 7.0 | 7.6  |
| UADBA 19609               | F | 55.2 | 3.3 | 7.0 | 4.7 | 2.9  | 3.0 | 4.6 | 17.4 | 24.5 | 16.1 | 11.0 | 28.3 | 28.2 | 27.4 | 11.3 | 9.5  | 3.3 | 7.6  | 2.3 | 8.0 | 8.5  |
| UADBA 19610               | F | 57.5 | 3.4 | 8.1 | 4.8 | 2.9  | 2.6 | 4.7 | 18.5 | 24.3 | 17.2 | 10.4 | 30.1 | 29.8 | 29.3 | 12.7 | 8.6  | 3.3 | 9.1  | 2.3 | 8.3 | 8.5  |
| UADBA 19646               | F | 53.4 | 3.2 | 7.0 | 4.3 | 2.8  | 3.3 | 4.7 | 16.8 | 22.5 | 16.4 | 11.0 | 28.5 | 28.2 | 28.3 | 11.8 | 9.2  | 3.0 | 7.5  | 2.4 | 7.8 | 8.5  |
| UADBA 19647 <sup>b</sup>  | F | 59.1 | 3.6 | 7.6 | 5.0 | 3.0  | 3.5 | 4.7 | 17.1 | 24.4 | 16.1 | 10.0 | 28.1 | 27.4 | 27.2 | 11.8 | 9.3  | 3.2 | 8.5  | 2.2 | 6.5 | 8.0  |
| UADBA 19649               | F | 53.3 | 3.4 | 8.2 | 5.1 | 2.4  | 3.3 | 4.8 | 18.1 | 23.6 | 16.7 | 9.6  | 28.5 | 27.3 | 28.4 | 12.3 | 8.2  | 2.6 | 7.6  | 2.4 | 7.4 | 8.5  |
| UADBA19686                | F | 51.0 | 4.3 | 6.9 | 4.7 | 2.7  | 3.3 | 5.0 | 17.6 | 22.3 | 15.2 | 9.6  | 27.0 | 27.0 | 26.7 | 12.0 | 8.7  | 3.0 | 8.3  | 2.2 | 7.1 | 7.6  |
| UADBA19687                | F | 57.8 | 4.8 | 8.1 | 5.1 | 2.9  | 3.1 | 5.3 | 19.4 | 24.0 | 14.3 | 9.9  | 28.3 | 28.1 | 26.2 | 12.0 | 10.2 | 3.2 | 8.0  | 2.3 | 7.1 | 8.2  |
| UADBA 26232               | F | 51.4 | 3.4 | 6.0 | 4.5 | 2.0  | 3.1 | 4.2 | 18.3 | 22.3 | 19.6 | 9.8  | 29.1 | 27.7 | 26.5 | 12.8 | 9.3  | 2.8 | 8.6  | 2.1 | 7.1 | 8.5  |
| UADBA 26233               | F | 51.2 | 3.9 | 7.6 | 3.6 | 3.0  | 3.1 | 4.4 | 16.8 | 21.9 | 13.8 | 9.6  | 26.3 | 25.5 | 26.5 | 11.0 | 8.2  | 2.8 | 8.6  | 2.6 | 6.9 | 7.5  |
| UADBA 26234               | F | 52.2 | 3.1 | 8.0 | 4.2 | 2.4  | 3.2 | 4.7 | 17.8 | 21.0 | 14.6 | 7.7  | 26.7 | 26.1 | 25.3 | 11.4 | 9.1  | 3.2 | 8.2  | 2.2 | 7.2 | 8.0  |
| UADBA 26235               | F | 52.0 | 4.4 | 7.6 | 3.1 | 2.8  | 1.2 | 5.5 | 20.0 | 23.7 | 17.0 | 10.7 | 30.3 | 30.0 | 28.5 | 13.7 | 10.1 | 3.3 | 8.4  | 2.4 | 7.6 | 8.6  |
| UADBA 26236               | F | 55.3 | 4.1 | 5.8 | 4.5 | 3.1  | 3.6 | 4.2 | 18.0 | 25.2 | 15.7 | 9.5  | 29.1 | 28.5 | 28.5 | 11.9 | 9.2  | 3.1 | 8.4  | 2.4 | 7.1 | 8.6  |
| UADBA 26237               | F | 49.8 | 3.8 | 6.5 | 4.1 | 2.8  | 3.0 | 4.0 | 17.1 | 20.4 | 15.0 | 9.7  | 26.7 | 27.5 | 25.5 | 12.1 | 10.0 | 3.4 | 8.4  | 2.2 | 6.5 | 7.0  |
| UADBA 26238               | F | 53.4 | 3.8 | 6.6 | 4.5 | 2.7  | 2.3 | 4.3 | 17.8 | 23.4 | 14.4 | 9.6  | 27.5 | 27.1 | 26.6 | 12.6 | 9.5  | 3.0 | 8.6  | 2.0 | 7.1 | 8.0  |

|                           |   |      |     |     |     |     |     |     |      |      |      |      |      |      |      |      |      |     |     |     |     |     |
|---------------------------|---|------|-----|-----|-----|-----|-----|-----|------|------|------|------|------|------|------|------|------|-----|-----|-----|-----|-----|
| UADBA 26239               | F | 54.1 | 3.5 | 6.7 | 3.8 | 2.6 | 3.1 | 4.9 | 16.9 | 22.4 | 14.4 | 9.2  | 27.7 | 26.9 | 27.2 | 11.5 | 8.6  | 3.3 | 7.7 | 2.0 | 6.7 | 7.5 |
| UADBA 26240               | F | 59.3 | 4.6 | 8.6 | 5.1 | 3.5 | 4.1 | 6.0 | 20.2 | 27.6 | 16.9 | 10.3 | 29.3 | 29.3 | 28.0 | 12.0 | 10.7 | 3.7 | 9.3 | 2.4 | 7.1 | 8.0 |
| UADBA 26241               | F | 50.7 | 3.7 | 6.4 | 4.1 | 3.0 | 2.8 | 4.8 | 18.5 | 22.7 | 16.0 | 9.9  | 28.5 | 28.3 | 26.8 | 10.7 | 9.1  | 4.1 | 7.4 | 2.0 | 7.0 | 8.6 |
| UADBA 26242               | F | 53.3 | 4.3 | 7.7 | 4.8 | 2.8 | 4.0 | 5.9 | 19.3 | 23.6 | 17.0 | 9.8  | 28.3 | 28.5 | 28.4 | 12.2 | 8.5  | 2.9 | 7.5 | 2.1 | 7.8 | 8.3 |
| UADBA 26243               | F | 49.0 | 3.3 | 6.4 | 3.3 | 2.7 | 3.2 | 4.7 | 16.4 | 19.7 | 15.1 | 9.7  | 26.9 | 27.0 | 25.0 | 12.3 | 8.2  | 3.0 | 7.3 | 2.0 | 7.3 | 8.4 |
| UADBA 26245               | F | 50.1 | 3.1 | 6.4 | 4.4 | 3.1 | 3.5 | 5.0 | 19.2 | 23.8 | 16.1 | 9.8  | 29.4 | 27.3 | 26.6 | 11.4 | 8.8  | 2.2 | 7.4 | 2.0 | 6.7 | 7.5 |
| UADBA 26246               | F | 50.6 | 3.5 | 7.0 | 3.8 | 2.8 | 3.1 | 4.3 | 16.1 | 21.3 | 15.8 | 9.4  | 27.1 | 26.6 | 26.2 | 12.6 | 8.8  | 3.0 | 7.5 | 1.9 | 6.8 | 7.8 |
| UADBA 26247               | F | 53.4 | 3.7 | 6.3 | 4.2 | 2.9 | 2.4 | 4.0 | 17.3 | 22.3 | 15.2 | 10.9 | 28.9 | 27.2 | 26.7 | 11.4 | 9.1  | 3.3 | 8.0 | 2.0 | 6.5 | 7.0 |
| UADBA 26248               | F | 53.3 | 3.1 | 6.0 | 4.7 | 2.8 | 2.1 | 3.8 | 18.1 | 22.4 | 15.4 | 10.2 | 27.7 | 27.2 | 27.5 | 11.2 | 9.1  | 3.1 | 7.8 | 2.0 | 7.0 | 7.8 |
| UADBA 26410               | F | 53.8 | 4.3 | 7.0 | 5.4 | 3.3 | 3.6 | 5.3 | 18.7 | 23.9 | 16.1 | 10.7 | 28.4 | 29.1 | 26.4 | 12.1 | 9.0  | 3.7 | 8.6 | 1.8 | 7.2 | 8.6 |
| AMNH A157118              | M | 40.2 | 3.8 | 5.8 | 3.0 | 1.9 | 2.0 | 3.2 | 13.0 | 18.6 | 12.0 | 7.0  | 20.0 | 29.6 | 20.1 | 7.8  | 7.4  | 2.2 | 5.7 | 1.5 | 5.3 | 5.7 |
| AMNH A157120              | M | 37.6 | 3.6 | 5.3 | 2.7 | 2.1 | 2.3 | 3.0 | 11.6 | 16.0 | 11.0 | 7.2  | 19.7 | 19.0 | 19.0 | 7.7  | 6.0  | 2.4 | 5.4 | 1.5 | 5.0 | 5.2 |
| AMNH A167584              | M | 44.9 | 3.8 | 4.4 | 3.8 | 2.3 | 2.7 | 3.4 | 14.6 | 21.2 | 13.7 | 8.3  | 24.4 | 22.3 | 22.5 | 9.1  | 8.2  | 2.8 | 7.1 | 1.8 | 6.0 | 7.0 |
| AMNH A167585              | M | 39.0 | 3.9 | 5.1 | 3.3 | 2.2 | 2.3 | 3.8 | 12.8 | 18.0 | 12.3 | 7.2  | 21.3 | 20.1 | 20.8 | 9.0  | 7.0  | 2.2 | 5.8 | 1.9 | 5.2 | 6.1 |
| AMNH A167586              | M | 40.7 | 4.4 | 5.7 | 3.4 | 2.7 | 2.8 | 3.0 | 13.6 | 19.2 | 12.0 | 7.5  | 21.4 | 19.4 | 20.0 | 8.3  | 7.6  | 2.6 | 6.7 | 2.0 | 5.5 | 5.7 |
| AMNH A167597              | M | 38.8 | 5.1 | 5.1 | 3.0 | 2.1 | 2.3 | 3.6 | 13.8 | 18.1 | 12.2 | 6.1  | 21.5 | 20.0 | 20.4 | 8.8  | 7.3  | 2.2 | 6.2 | 1.7 | 5.1 | 6.2 |
| AMNH A174622 <sup>b</sup> | M | 40.5 | 4.8 | 5.6 | 3.1 | 2.0 | 2.6 | 3.8 | 13.0 | 19.1 | 12.4 | 6.7  | 19.8 | 20.0 | 20.0 | 7.7  | 7.3  | 2.9 | 6.0 | 1.6 | 5.3 | 5.5 |
| AMNH A174628 <sup>b</sup> | M | 41.5 | 5.1 | 5.9 | 3.0 | 2.1 | 2.2 | 3.2 | 13.7 | 20.5 | 12.1 | 7.0  | 20.2 | 20.2 | 21.5 | 8.9  | 6.8  | 2.4 | 6.9 | 1.8 | 4.8 | 6.6 |
| UADBA 3719                | M | 40.5 | 5.2 | 5.8 | 3.6 | 2.6 | 2.7 | 4.0 | 13.8 | 18.1 | 12.3 | 7.7  | 20.6 | 20.0 | 20.3 | 10.0 | 6.5  | 2.3 | 6.8 | 1.7 | 5.4 | 6.0 |
| UADBA 6282                | M | 39.5 | 4.3 | 5.9 | 3.2 | 2.2 | 2.7 | 4.0 | 13.1 | 18.1 | 11.2 | 7.3  | 19.6 | 19.5 | 19.4 | 8.3  | 6.2  | 2.1 | 5.6 | 1.3 | 4.7 | 5.4 |
| UADBA 7312                | M | 44.0 | 4.3 | 5.9 | 3.6 | 1.9 | 2.7 | 4.5 | 13.4 | 18.8 | 12.9 | 8.7  | 21.2 | 21.4 | 20.6 | 8.5  | 6.6  | 2.3 | 6.6 | 1.5 | 5.5 | 6.1 |
| UADBA 7313                | M | 36.7 | 3.8 | 4.5 | 3.6 | 2.1 | 2.4 | 3.8 | 12.4 | 16.5 | 11.3 | 8.8  | 20.4 | 20.0 | 19.0 | 9.7  | 6.8  | 2.1 | 6.0 | 1.6 | 5.3 | 6.1 |
| UADBA 7774                | M | 37.0 | 4.2 | 5.8 | 3.2 | 2.1 | 2.0 | 3.8 | 12.3 | 16.7 | 11.1 | 6.6  | 20.7 | 19.4 | 19.1 | 8.3  | 6.2  | 2.5 | 5.6 | 1.5 | 5.2 | 5.8 |
| UADBA 7766                | M | 40.5 | 4.1 | 6.1 | 3.6 | 2.2 | 2.6 | 3.8 | 13.1 | 17.1 | 11.3 | 5.8  | 21.4 | 19.6 | 19.5 | 7.3  | 6.9  | 2.1 | 5.7 | 1.6 | 4.8 | 5.6 |
| UADBA 8121                | M | 43.3 | 5.2 | 6.5 | 3.4 | 2.5 | 3.1 | 4.4 | 15.8 | 18.7 | 12.1 | 7.6  | 22.6 | 21.1 | 21.0 | 9.2  | 6.7  | 2.2 | 5.6 | 1.6 | 5.2 | 5.6 |
| UADBA 12310               | M | 38.7 | 4.0 | 4.2 | 3.4 | 2.1 | 1.4 | 3.0 | 12.4 | 17.9 | 11.3 | 6.1  | 20.0 | 20.1 | 17.6 | 9.2  | 6.2  | 2.0 | 6.1 | 1.6 | 5.2 | 6.2 |
| UADBA 12311               | M | 38.4 | 4.0 | 4.6 | 3.2 | 2.1 | 2.0 | 3.4 | 11.6 | 19.1 | 11.0 | 7.6  | 19.4 | 20.2 | 20.6 | 8.3  | 6.4  | 2.1 | 6.4 | 1.2 | 5.5 | 6.2 |
| UADBA 19600               | M | 40.4 | 3.7 | 5.6 | 3.8 | 2.2 | 2.6 | 3.4 | 12.7 | 19.0 | 12.4 | 6.9  | 21.6 | 20.8 | 20.1 | 8.8  | 7.6  | 2.2 | 5.6 | 1.7 | 5.9 | 6.3 |
| UADBA 19601               | M | 37.4 | 3.2 | 4.8 | 3.8 | 2.4 | 2.6 | 3.4 | 12.9 | 16.8 | 12.1 | 7.0  | 19.8 | 19.6 | 18.9 | 9.0  | 7.0  | 2.1 | 5.3 | 1.5 | 5.4 | 5.7 |
| UADBA 19602               | M | 45.3 | 4.1 | 6.4 | 4.1 | 2.6 | 3.7 | 4.1 | 14.4 | 21.2 | 12.9 | 7.8  | 23.4 | 21.8 | 22.7 | 9.6  | 7.0  | 2.3 | 6.5 | 1.9 | 5.7 | 6.7 |
| UADBA 19604               | M | 39.7 | 5.0 | 5.3 | 3.4 | 2.1 | 2.6 | 3.7 | 12.9 | 19.0 | 12.4 | 7.6  | 20.4 | 20.0 | 20.3 | 9.2  | 9.4  | 3.6 | 9.0 | 1.7 | 7.0 | 7.6 |
| UADBA 19605               | M | 39.8 | 5.2 | 5.2 | 3.2 | 1.9 | 1.2 | 3.6 | 12.8 | 18.2 | 12.4 | 7.2  | 21.0 | 19.7 | 19.8 | 8.8  | 6.8  | 2.4 | 6.5 | 1.5 | 5.0 | 5.9 |
| UADBA 19606               | M | 41.3 | 4.0 | 5.3 | 3.8 | 2.4 | 2.4 | 3.6 | 13.3 | 18.8 | 12.2 | 7.5  | 21.2 | 20.9 | 21.7 | 9.2  | 6.9  | 2.1 | 5.7 | 1.7 | 5.0 | 5.8 |

|             |   |      |     |     |     |     |     |     |      |      |      |     |      |      |      |     |     |     |     |     |     |     |
|-------------|---|------|-----|-----|-----|-----|-----|-----|------|------|------|-----|------|------|------|-----|-----|-----|-----|-----|-----|-----|
| UADBA 19596 | M | 39.9 | 4.2 | 5.3 | 3.7 | 2.3 | 2.3 | 3.4 | 12.4 | 18.9 | 11.6 | 7.0 | 20.1 | 19.5 | 19.7 | 9.1 | 7.1 | 2.3 | 6.4 | 1.6 | 5.2 | 6.1 |
| UADBA 19685 | M | 36.1 | 4.0 | 5.4 | 2.9 | 2.0 | 2.7 | 4.2 | 11.9 | 17.7 | 11.1 | 5.6 | 18.3 | 18.3 | 18.0 | 7.8 | 6.4 | 2.0 | 5.7 | 1.3 | 4.8 | 5.3 |
| UADBA 19689 | M | 38.4 | 4.4 | 5.0 | 3.3 | 2.1 | 2.1 | 4.6 | 13.1 | 16.8 | 11.4 | 7.6 | 20.8 | 20.6 | 20.5 | 9.1 | 7.1 | 2.3 | 6.0 | 1.5 | 5.6 | 6.2 |
| UADBA 19690 | M | 36.6 | 4.1 | 5.3 | 3.2 | 2.0 | 2.5 | 4.0 | 12.5 | 16.1 | 10.4 | 6.3 | 19.0 | 19.3 | 18.2 | 7.3 | 6.3 | 2.3 | 5.5 | 1.3 | 4.8 | 5.6 |
| UADBA 26298 | M | 42.0 | 4.7 | 5.3 | 4.0 | 2.6 | 3.1 | 4.6 | 14.2 | 19.0 | 12.8 | 7.8 | 20.2 | 20.2 | 21.0 | 9.6 | 7.5 | 2.4 | 6.3 | 1.3 | 5.0 | 6.1 |
| UADBA 26300 | M | 43.1 | 5.2 | 6.3 | 3.6 | 2.4 | 3.2 | 4.3 | 15.2 | 19.3 | 12.1 | 7.3 | 23.0 | 21.2 | 21.0 | 8.3 | 7.9 | 2.6 | 6.3 | 1.6 | 5.0 | 6.0 |
| UADBA 26303 | M | 38.4 | 4.0 | 5.5 | 3.4 | 2.1 | 2.0 | 3.3 | 11.9 | 16.4 | 11.6 | 7.3 | 21.7 | 20.4 | 20.3 | 8.5 | 6.3 | 2.0 | 5.4 | 1.6 | 5.6 | 6.0 |
| UADBA 26304 | M | 36.3 | 3.9 | 4.8 | 3.3 | 2.1 | 2.4 | 3.1 | 11.6 | 16.7 | 12.1 | 7.7 | 20.3 | 19.4 | 20.0 | 8.4 | 6.4 | 2.0 | 5.2 | 1.3 | 5.0 | 5.4 |
| UADBA 26305 | M | 38.2 | 3.5 | 5.0 | 3.6 | 2.1 | 2.6 | 3.5 | 11.6 | 17.3 | 11.2 | 6.5 | 18.8 | 18.1 | 18.8 | 8.1 | 6.8 | 2.1 | 5.3 | 1.5 | 4.4 | 5.3 |
| UADBA 19640 | M | 36.6 | 5.0 | 5.0 | 3.2 | 2.1 | 2.3 | 3.3 | 12.6 | 17.5 | 11.5 | 6.8 | 20.8 | 19.2 | 18.6 | 7.8 | 5.9 | 1.8 | 5.5 | 1.3 | 4.7 | 5.2 |
| UADBA 19648 | M | 41.2 | 4.2 | 5.6 | 2.9 | 2.2 | 2.4 | 3.6 | 13.0 | 17.2 | 11.8 | 6.6 | 18.8 | 19.8 | 19.4 | 8.2 | 7.1 | 2.2 | 6.5 | 1.6 | 5.4 | 5.8 |
| UADBA 19652 | M | 44.2 | 4.8 | 6.3 | 3.4 | 2.3 | 2.8 | 4.2 | 14.6 | 20.5 | 13.0 | 7.0 | 21.7 | 20.6 | 21.0 | 7.9 | 7.6 | 2.2 | 6.6 | 1.7 | 4.9 | 5.4 |
| UADBA 19653 | M | 38.4 | 4.0 | 5.5 | 3.4 | 2.1 | 2.0 | 3.3 | 11.9 | 16.4 | 11.6 | 7.3 | 21.7 | 20.4 | 20.3 | 8.5 | 7.5 | 2.9 | 6.0 | 2.1 | 5.6 | 6.2 |
| UADBA 19654 | M | 40.8 | 4.4 | 5.7 | 3.6 | 2.1 | 2.3 | 3.8 | 13.0 | 17.6 | 12.6 | 7.7 | 20.2 | 21.0 | 21.3 | 8.8 | 7.6 | 2.2 | 6.0 | 1.7 | 6.1 | 6.5 |
| UADBA 19597 | M | 39.1 | 4.1 | 5.8 | 3.6 | 2.0 | 2.7 | 3.8 | 13.2 | 19.2 | 12.9 | 7.5 | 21.4 | 20.8 | 20.5 | 9.8 | 7.3 | 2.4 | 5.8 | 2.1 | 5.0 | 6.2 |
| UADBA 26279 | M | 43.2 | 4.8 | 6.1 | 3.3 | 2.5 | 3.2 | 3.7 | 15.2 | 20.3 | 12.4 | 8.3 | 21.5 | 21.7 | 21.6 | 9.0 | 6.8 | 2.4 | 7.3 | 1.8 | 5.4 | 6.2 |
| UADBA 26285 | M | 40.4 | 4.0 | 5.4 | 3.7 | 2.0 | 2.1 | 3.3 | 13.1 | 18.4 | 11.4 | 7.0 | 21.2 | 20.6 | 20.0 | 7.8 | 7.1 | 2.4 | 6.0 | 1.7 | 5.3 | 6.0 |
| UADBA 26286 | M | 41.8 | 4.4 | 6.3 | 3.5 | 2.5 | 2.9 | 3.7 | 14.1 | 19.3 | 12.4 | 6.6 | 21.8 | 19.5 | 21.7 | 8.3 | 6.9 | 2.6 | 6.5 | 1.7 | 5.3 | 5.6 |
| UADBA 26287 | M | 44.7 | 4.3 | 5.0 | 3.6 | 2.3 | 2.8 | 3.4 | 14.5 | 18.6 | 13.2 | 7.7 | 23.3 | 22.9 | 23.8 | 9.9 | 7.7 | 2.5 | 6.7 | 1.7 | 5.7 | 7.0 |
| UADBA 26288 | M | 40.0 | 4.0 | 5.2 | 3.3 | 1.8 | 2.3 | 3.7 | 12.7 | 16.7 | 11.6 | 7.1 | 20.0 | 20.2 | 18.8 | 9.0 | 5.6 | 2.5 | 5.8 | 1.4 | 5.4 | 6.1 |
| UADBA 26289 | M | 40.6 | 3.8 | 5.2 | 2.9 | 2.0 | 2.2 | 3.8 | 13.1 | 18.1 | 12.2 | 7.3 | 21.1 | 20.1 | 21.0 | 8.7 | 6.9 | 2.1 | 5.8 | 1.6 | 5.0 | 6.2 |
| UADBA 26290 | M | 39.5 | 4.3 | 4.6 | 3.1 | 2.2 | 3.1 | 3.1 | 13.4 | 18.0 | 12.4 | 7.2 | 21.3 | 20.9 | 21.4 | 9.1 | 6.0 | 2.3 | 6.4 | 1.7 | 5.6 | 6.2 |
| UADBA 26291 | M | 38.6 | 3.5 | 5.0 | 2.7 | 2.0 | 2.4 | 3.4 | 13.6 | 16.1 | 12.2 | 7.5 | 20.4 | 20.0 | 20.2 | 8.4 | 6.1 | 2.3 | 6.0 | 1.6 | 5.4 | 5.8 |
| UADBA 26292 | M | 40.1 | 3.4 | 4.5 | 3.1 | 2.5 | 2.5 | 3.7 | 13.4 | 18.1 | 11.9 | 6.6 | 20.7 | 20.6 | 20.5 | 8.6 | 6.6 | 2.4 | 6.1 | 1.9 | 5.5 | 5.9 |
| UADBA 26293 | M | 42.7 | 4.0 | 5.9 | 3.1 | 2.4 | 2.6 | 3.6 | 13.1 | 19.5 | 12.7 | 6.5 | 21.6 | 20.1 | 21.6 | 9.4 | 6.7 | 2.5 | 6.8 | 1.5 | 5.2 | 6.0 |
| UADBA 26299 | M | 36.1 | 3.7 | 4.9 | 3.0 | 2.3 | 2.6 | 3.9 | 12.4 | 16.5 | 11.3 | 6.7 | 19.5 | 19.0 | 18.6 | 8.6 | 6.8 | 2.2 | 6.4 | 1.7 | 4.9 | 5.1 |

<sup>b</sup> ID molecular

**Table S6.** Measurement data for *Mantidactylus zolitschka*. All measurements in mm. ZFMK specimen data from Glaw and Vences (2004).  
F: female, M: male, J: juvenile, SA: subadult

| Specimen   | Sexes | SVL  | TD  | ED  | EN  | EST | NS  | NN  | HW  | HL   | HDL | RC  | FE   | TI   | FT   | TA  | EO  | EM  | EHEAD | T1  | TO3 | TO5 |
|------------|-------|------|-----|-----|-----|-----|-----|-----|-----|------|-----|-----|------|------|------|-----|-----|-----|-------|-----|-----|-----|
| UADBA 6965 | M     | 26.5 | 2.8 | 3.6 | 1.9 | 0.6 | 1.3 | 1.6 | 8.8 | 11.2 | 8.0 | 5.2 | 14.3 | 14.5 | 15.4 | 6.8 | 4.4 | 2.0 | 5.4   | 0.8 | 4.8 | 5.3 |
| UADBA 6966 | M     | 27.7 | 3.0 | 3.6 | 2.0 | 1.2 | 1.4 | 2.3 | 9.4 | 13.1 | 9.0 | 5.3 | 14.8 | 14.7 | 15.5 | 6.2 | 4.6 | 1.9 | 4.9   | 0.9 | 4.8 | 5.3 |

|                         |   |      |     |     |     |   |     |     |      |      |      |   |   |   |      |   |   |   |   |   |   |
|-------------------------|---|------|-----|-----|-----|---|-----|-----|------|------|------|---|---|---|------|---|---|---|---|---|---|
| ZFMK 60110 <sup>a</sup> | M | 30.6 | 3.0 | 3.7 | 2.7 | - | 1.8 | 3.3 | 10.5 | 12.0 | 10.0 | - | - | - | 16.9 | - | - | - | - | - | - |
| ZFMK 60112              | M | 28.8 | 3.2 | 3.7 | 2.5 | - | 1.8 | 3.0 | 9.9  | 11.3 | 10.0 | - | - | - | 15.2 | - | - | - | - | - | - |
| ZFMK 60113              | M | 29.8 | 3.1 | 3.3 | 2.7 | - | 2.0 | 3.1 | 10.0 | 11.7 | 9.9  | - | - | - | 16.2 | - | - | - | - | - | - |
| ZFMK 60114              | M | 30.6 | 3.0 | 3.3 | 2.5 | - | 1.8 | 2.8 | 10.0 | 11.6 | 9.6  | - | - | - | 16.7 | - | - | - | - | - | - |
| ZSM 939/2000            | M | 29.6 | 3.2 | 3.4 | 2.4 | - | 1.8 | 2.6 | 10.0 | 11.4 | 10.2 | - | - | - | 17.2 | - | - | - | - | - | - |
| ZFMK 60115              | F | 37.7 | 2.8 | 4.5 | 3.5 | - | 2.2 | 3.7 | 12.8 | 15.0 | 11.9 | - | - | - | 20.9 | - | - | - | - | - | - |
| ZFMK 60116              | F | 37.6 | 3.0 | 4.3 | 3.3 | - | 2.4 | 3.6 | 12.8 | 14.3 | 12.0 | - | - | - | 20.8 | - | - | - | - | - | - |
| ZSM 184/2003            | F | 33.6 | 2.5 | 4.2 | 3.4 | - | 2.3 | 2.9 | 11.3 | 14.0 | 10.6 | - | - | - | 19.5 | - | - | - | - | - | - |

<sup>a</sup>Holotype

**Table S7.** Measurement data for *Mantidactylus catalai*. All measurements in mm. F: female, M: male, J: juvenile, SA: subadult

| Specimen                 | Sexes | SVL  | TD  | ED  | EN  | EST | NS  | NN  | HW   | HL   | HDL  | RC   | FE   | TI   | FT   | TA   | EO   | EM  | EHEAD | T1  | TO3 | TO5 |
|--------------------------|-------|------|-----|-----|-----|-----|-----|-----|------|------|------|------|------|------|------|------|------|-----|-------|-----|-----|-----|
| AMNH A133690             | F     | 58.9 | 3.5 | 6.9 | 3.6 | 2.0 | 1.3 | 5.3 | 19.3 | 22.7 | 17.2 | 9.7  | 29.3 | 31.2 | 30.3 | 13.8 | 10.0 | 3.2 | 8.3   | 2.0 | 8.2 | 9.3 |
| UADBA3706                | F     | 52.1 | 4.1 | 6.2 | 4.7 | 2.3 | 2.4 | 4.8 | 17.1 | 22.2 | 13.0 | 9.8  | 27.0 | 29.2 | 26.8 | 11.3 | 10.1 | 2.8 | 7.6   | 2.3 | 7.2 | 8.0 |
| UADBA4513                | F     | 53.6 | 4.1 | 6.0 | 4.6 | 2.1 | 2.3 | 4.9 | 18.3 | 22.8 | 17.0 | 9.2  | 28.0 | 28.3 | 27.7 | 12.0 | 8.8  | 2.9 | 6.7   | 2.4 | 7.1 | 8.2 |
| UADBA9772                | F     | 61.5 | 4.5 | 6.5 | 4.8 | 1.6 | 2.8 | 5.1 | 19.4 | 26.6 | 16.7 | 9.6  | 29.5 | 29.8 | 29.4 | 14.0 | 9.7  | 3.7 | 8.1   | 2.0 | 7.6 | 8.6 |
| UADBA9773                | F     | 52.7 | 4.0 | 6.2 | 4.7 | 2.8 | 2.2 | 5.1 | 18.1 | 22.5 | 15.7 | 9.8  | 28.1 | 28.1 | 28.3 | 12.4 | 8.8  | 3.6 | 7.5   | 1.8 | 7.3 | 8.3 |
| UADBA9774                | F     | 60.0 | 4.1 | 8.2 | 5.4 | 3.5 | 3.8 | 5.6 | 21.0 | 25.9 | 18.1 | 10.7 | 29.6 | 30.9 | 30.5 | 13.4 | 10.4 | 3.3 | 9.1   | 2.4 | 8.2 | 9.1 |
| UADBA26403               | F     | 51.9 | 4.3 | 7.8 | 4.4 | 3.0 | 2.8 | 5.8 | 20.8 | 25.4 | 18.0 | 11.3 | 31.8 | 32.1 | 32.0 | 14.0 | 10.3 | 3.5 | 9.3   | 2.5 | 7.7 | 8.6 |
| UADBA26404               | F     | 57.9 | 4.2 | 7.4 | 5.4 | 2.4 | 3.6 | 4.8 | 19.3 | 24.3 | 16.9 | 11.2 | 30.1 | 29.2 | 30.0 | 12.6 | 10.0 | 3.6 | 8.6   | 2.4 | 8.8 | 9.7 |
| UADBA26405               | F     | 57.0 | 4.5 | 7.7 | 4.7 | 2.6 | 1.5 | 5.0 | 18.7 | 23.8 | 16.9 | 11.8 | 31.0 | 30.7 | 29.4 | 14.2 | 9.3  | 3.5 | 8.4   | 2.5 | 8.1 | 8.5 |
| UMMZ 212890 <sup>b</sup> | F     | 63.3 | 4.7 | 7.5 | 4.9 | 2.9 | 3.3 | 4.7 | 21.5 | 27.5 | 17.9 | 12.1 | 31.9 | 32.0 | 30.0 | 13.5 | 11.3 | 4.1 | 8.6   | 3.0 | 8.5 | 9.1 |
| AMNH A168364             | M     | 42.3 | 4.7 | 5.6 | 3.3 | 2.2 | 2.2 | 3.7 | 18.5 | 19.3 | 13.1 | 9.2  | 21.6 | 20.7 | 20.2 | 9.4  | 6.8  | 3.1 | 6.8   | 1.8 | 5.6 | 6.1 |
| UADBA1419                | M     | 42.6 | 6.2 | 6.0 | 3.8 | 2.6 | 2.4 | 4.0 | 15.0 | 21.1 | 17.9 | 8.1  | 22.5 | 22.5 | 23.0 | 10.3 | 7.3  | 2.3 | 7.7   | 2.2 | 6.1 | 6.4 |
| UADBA1420                | M     | 41.1 | 5.1 | 5.1 | 3.4 | 2.6 | 2.3 | 4.5 | 13.8 | 17.8 | 12.0 | 7.9  | 20.6 | 22.4 | 20.1 | 8.4  | 6.6  | 2.4 | 7.3   | 1.8 | 5.3 | 5.8 |
| UADBA1421                | M     | 44.6 | 5.8 | 5.6 | 3.6 | 2.8 | 2.7 | 4.8 | 15.0 | 20.2 | 13.6 | 9.6  | 22.4 | 23.2 | 22.1 | 11.1 | 7.7  | 2.0 | 7.5   | 1.6 | 6.1 | 6.6 |
| UADBA1423                | M     | 43.9 | 5.0 | 5.0 | 3.9 | 2.3 | 1.9 | 4.4 | 15.3 | 20.0 | 13.8 | 8.4  | 21.8 | 23.6 | 24.5 | 10.1 | 7.2  | 2.9 | 7.0   | 2.0 | 6.4 | 7.2 |
| UADBA4514                | M     | 45.4 | 5.1 | 5.1 | 4.1 | 1.8 | 2.7 | 4.3 | 15.0 | 20.6 | 14.1 | 8.6  | 24.0 | 23.5 | 23.3 | 10.6 | 7.4  | 2.4 | 7.1   | 1.8 | 5.8 | 6.2 |
| UADBA4516                | M     | 43.9 | 5.1 | 5.1 | 3.7 | 2.6 | 3.3 | 4.9 | 14.5 | 19.0 | 13.5 | 8.0  | 22.1 | 22.0 | 21.8 | 11.2 | 6.8  | 2.4 | 7.4   | 1.8 | 5.9 | 6.2 |
| UADBA4521                | M     | 45.4 | 5.2 | 5.8 | 4.3 | 3.2 | 2.6 | 4.3 | 14.8 | 19.6 | 15.0 | 12.7 | 22.8 | 22.6 | 22.2 | 9.7  | 7.0  | 2.7 | 7.3   | 1.9 | 6.1 | 6.8 |
| UADBA4522                | M     | 45.2 | 6.6 | 6.2 | 4.3 | 2.8 | 2.7 | 4.1 | 15.3 | 20.4 | 12.8 | 8.0  | 21.3 | 21.2 | 20.8 | 10.0 | 7.4  | 2.3 | 6.7   | 2.1 | 5.8 | 6.1 |
| UADBA4523                | M     | 43.0 | 5.6 | 5.2 | 3.6 | 3.1 | 2.1 | 4.3 | 15.0 | 19.0 | 12.7 | 8.0  | 22.0 | 21.4 | 20.8 | 11.4 | 6.9  | 2.6 | 7.3   | 2.3 | 5.4 | 6.0 |
| UADBA9782                | M     | 43.4 | 5.0 | 5.2 | 3.5 | 3.1 | 2.4 | 3.4 | 14.7 | 18.5 | 13.0 | 8.2  | 22.6 | 21.6 | 20.7 | 11.5 | 6.7  | 2.6 | 6.3   | 1.8 | 6.0 | 6.4 |

<sup>b</sup>ID Molecular

**Table S8.** Measurement data for *Mantidactylus poissoni*. All measurements in mm. F: female, M: male, J: juvenile, SA: subadult

| Specimen      | Sexes | SVL  | TD  | ED  | EN  | EST | NS  | NN  | HW   | HL   | HDL  | RC   | FE   | TI   | FT   | TA   | EO   | EM  | EHEAD | T1  | TO3  | TO5  |
|---------------|-------|------|-----|-----|-----|-----|-----|-----|------|------|------|------|------|------|------|------|------|-----|-------|-----|------|------|
| MNHN 1937.1*  | F     | 53.4 | 3.4 | 6.4 | 4.3 | 1.6 | 2.8 | 4.8 | 16.1 | 21.2 | 13.5 | 9.4  | 29.1 | 30.8 | 29.1 | 13.6 | 9.5  | 3.1 | 7.7   | 1.7 | 7.2  | 8.5  |
| AMNH A174653* | -     | -    | -   | -   | -   | -   | -   | -   | -    | -    | -    | -    | -    | -    | -    | -    | -    | -   | -     | -   | -    | -    |
| AMNH A174650  | F     | 64.4 | 3.3 | 6.0 | 5.4 | 2.4 | 3.5 | 5.6 | 21.8 | 27.2 | 20.2 | 13.7 | 34.5 | 37.3 | 35.2 | 15.9 | 10.5 | 3.5 | 10.8  | 3.1 | 9.2  | 10.8 |
| UADBA 6876    | F     | 55   | 4.2 | 6.6 | 5.0 | 2.7 | 2.9 | 5.0 | 19.4 | 23.8 | 17.6 | 11.9 | 31.8 | 31.8 | 31.3 | 13.7 | 9.7  | 3.4 | 8.7   | 2.4 | 9.0  | 9.6  |
| UADBA 7125    | F     | 65.3 | 4.0 | 9.0 | 5.4 | 2.3 | 3.5 | 5.9 | 22.1 | 26.9 | 18.4 | 13.0 | 35.7 | 35.4 | 32.0 | 16.1 | 12   | 3.4 | 10.0  | 2.3 | 9.0  | 10.2 |
| UADBA 19786   | SA    | 51.0 | 4.2 | 7.2 | 4.3 | 2.0 | 2.8 | 5.8 | 17.4 | 24.2 | 15.3 | 9.4  | 26.9 | 27.3 | 27.3 | 11.0 | 8.5  | 3.1 | 8.2   | 1.5 | 7.3  | 8.4  |
| UADBA 26409   | F     | 63.9 | 4.7 | 7.1 | 5.3 | 3.3 | 4.6 | 6.0 | 20.5 | 27.8 | 17.5 | 11.1 | 30.0 | 30.3 | 30.2 | 12.0 | 11.4 | 3.8 | 10.2  | 2.8 | 11.0 | 11.4 |
| UADBA 26411   | F     | 60.8 | 4.3 | 7.6 | 5.3 | 2.7 | 2.9 | 4.9 | 22.2 | 25.9 | 18.0 | 11.8 | 33.3 | 34.9 | 32.5 | 15.5 | 10.3 | 3.4 | 9.7   | 2.9 | 9.0  | 10.0 |
| UADBA 26412   | F     | 59.4 | 4.5 | 6.5 | 4.1 | 2.0 | 2.1 | 4.6 | 20.7 | 24.2 | 20.0 | 11.4 | 30.5 | 33.3 | 34.3 | 15.1 | 9.8  | 3.4 | 9.3   | 2.7 | 9.4  | 10.3 |
| AMNH A50362   | M     | 39.7 | 3.6 | 5.8 | 3.6 | 1.5 | 1.8 | 4.0 | 12.5 | 17.7 | 13.0 | 9.0  | -    | -    | -    | -    | 7.4  | 2.7 | 6.8   | -   | -    | -    |
| UADBA 11899   | M     | 48.2 | 5.7 | 6.5 | 4.2 | 2.4 | 3.7 | 5.0 | 17.1 | 22.2 | 14.6 | 10.0 | 24.8 | 26.0 | 26.6 | 11.0 | 9.2  | 2.9 | 7.6   | 1.8 | 7.3  | 8.3  |
| UADBA 39000   | M     | 46.8 | 6.0 | 6.1 | 3.8 | 2.8 | 2.1 | 4.3 | 16.8 | 21.0 | 13.3 | 9.6  | 24.4 | 24.3 | 22.7 | 8.8  | 10.0 | 4.0 | 9.4   | 2.0 | 7.6  | 8.6  |

\*Reference specimen

**Table S9.** Measurement data for *Mantidactylus danieli* n. sp.. All measurements in mm. F: female, M: male, J: juvenile, SA: subadult

| Specimen                   | Sexes | SVL  | TD  | ED  | EN  | EST | NS  | NN  | HW   | HL   | HDL  | RC   | FE   | TI   | FT   | TA   | EO  | EM  | EHEAD | T1  | TO3 | TO5 |
|----------------------------|-------|------|-----|-----|-----|-----|-----|-----|------|------|------|------|------|------|------|------|-----|-----|-------|-----|-----|-----|
| AMNH A167523 <sup>b</sup>  | J     | 27.8 | -   | -   | -   | -   | -   | -   | -    | -    | -    | -    | -    | -    | -    | -    | -   | -   | -     | -   | -   | -   |
| AMNH A167578               | F     | 53.0 | 6.5 | 9.4 | 4.7 | 0.6 | 1.1 | 3.8 | 20.4 | 25.1 | 14.9 | 11.7 | 26.0 | 27.4 | 29.7 | 13.6 | 9.4 | 3.3 | 8.8   | 1.9 | 7.6 | 8.7 |
| AMNH A167579               | F     | 47.7 | 4.8 | 8.7 | 4.2 | 0.4 | 1.6 | 4.0 | 17.4 | 20.0 | 14.4 | 9.6  | 23.6 | 25.7 | 25.9 | 12.5 | 8.7 | 3.3 | 7.7   | 2.2 | 6.9 | 7.2 |
| AMNH A167590 <sup>*b</sup> | F     | 50.6 | 3.8 | 5.1 | 2.4 | 1.0 | 1.9 | 3.6 | 17.4 | 20.6 | 13.1 | 9.2  | 24.1 | 24.7 | 25.2 | 11.5 | 8.8 | 3.0 | 7.6   | 1.9 | 6.2 | 7.4 |
| AMNH A167592               | F     | 46.1 | 3.7 | 4.9 | 2.0 | 1.5 | 2.5 | 4.1 | 16.8 | 20.2 | 13.6 | 8.5  | 24.9 | 25.8 | 25.9 | 11.5 | 8.3 | 3.0 | 7.4   | 1.8 | 6.3 | 7.0 |
| UADBA 8382                 | F     | 53.0 | 4.6 | 6.0 | 4.7 | 1.9 | 3.3 | 5.0 | 18.4 | 24.3 | 14.3 | 10.7 | 25.3 | 27.2 | 26.7 | 14.5 | 9.5 | 3.1 | 8.9   | 2.3 | 6.1 | 7.4 |
| UADBA 12140                | F     | 42.3 | 3.6 | 5.0 | 4.0 | 2.1 | 2.3 | 4.3 | 15.5 | 19.0 | 12.7 | 8.1  | 22.1 | 23.4 | 23.5 | 11.0 | 7.5 | 2.7 | 6.5   | 1.7 | 6.1 | 7.0 |
| UADBA 19593                | F     | 50.1 | 3.5 | 6.1 | 4.3 | 1.4 | 2.3 | 3.6 | 16.3 | 21.6 | 11.0 | 9.6  | 26.1 | 28.1 | 28.9 | 14.3 | 8.5 | 2.5 | 7.6   | 1.8 | 7.7 | 8.7 |
| UADBA 26365                | F     | 49.0 | 4.4 | 6.6 | 3.4 | 2.1 | 2.9 | 4.6 | 16.8 | 20.9 | 14.5 | 10.3 | 25.7 | 27.4 | 28.0 | 12.4 | 8.2 | 3.0 | 7.7   | 1.8 | 6.7 | 7.8 |
| UADBA 26366                | F     | 48.8 | 4.3 | 6.3 | 4.0 | 2.3 | 3.0 | 4.7 | 16.7 | 22.1 | 15.5 | 8.5  | 25.5 | 27.1 | 28.2 | 11.9 | 8.8 | 2.8 | 7.7   | 2.0 | 6.4 | 7.6 |
| UADBA 26367                | F     | 49.4 | 4.1 | 6.0 | 4.0 | 2.6 | 2.7 | 4.8 | 16.7 | 21.8 | 15.1 | 10.4 | 26.1 | 27.1 | 27.8 | 13.0 | 9.2 | 2.9 | 7.9   | 1.7 | 6.2 | 7.6 |
| UADBA 26368                | F     | 48.4 | 4.1 | 5.8 | 4.2 | 2.4 | 2.1 | 4.3 | 16.6 | 21.4 | 14.5 | 8.7  | 25.1 | 26.6 | 27.5 | 12.6 | 8.5 | 3.1 | 7.4   | 2.1 | 6.6 | 7.2 |



|                            |    |      |     |     |     |     |     |     |      |      |      |      |      |      |      |      |     |     |     |     |     |     |
|----------------------------|----|------|-----|-----|-----|-----|-----|-----|------|------|------|------|------|------|------|------|-----|-----|-----|-----|-----|-----|
| AMNH 181726 <sup>b</sup>   | J  | -    | -   | -   | -   | -   | -   | -   | -    | -    | -    | -    | -    | -    | -    | -    | -   | -   | -   | -   | -   | -   |
| AMNH A167556               | F  | 45.8 | 2.9 | 4.9 | 4.0 | 2.3 | 2.3 | 3.2 | 15.2 | 18.7 | 13.5 | 9.1  | 25.8 | 24.0 | 23.0 | 8.8  | 8.0 | 2.7 | 6.9 | 1.3 | 5.8 | 6.7 |
| AMNH A167558               | F  | 49.6 | 3.6 | 6.7 | 2.7 | 2.8 | 2.4 | 4.0 | 15.4 | 22.1 | 15.1 | 8.4  | 25.5 | 23.7 | 25.4 | 9.8  | 8.7 | 3.0 | 7.4 | 2.1 | 6.2 | 7.6 |
| AMNH A167561               | F  | 46.5 | 3.6 | 5.8 | 3.9 | 2.5 | 2.4 | 3.5 | 16.4 | 18.9 | 13.0 | 7.5  | 23.6 | 22.6 | 22.6 | 10.0 | 8.6 | 3.1 | 6.9 | 1.7 | 5.7 | 6.2 |
| AMNH A167562               | F  | 51.8 | 2.6 | 6.6 | 4.0 | 2.3 | 2.3 | 3.9 | 16.9 | 21.8 | 14.5 | 9.2  | 25.0 | 24.1 | 24.8 | 11.5 | 8.6 | 3.4 | 7.5 | 2.4 | 6.6 | 7.6 |
| AMNH A167563               | F  | 51.0 | 3.2 | 6.4 | 3.7 | 2.9 | 2.8 | 3.8 | 17.1 | 20.6 | 14.1 | 7.7  | 25.1 | 23.7 | 22.5 | 9.8  | 8.7 | 3.2 | 7.8 | 1.8 | 5.7 | 6.4 |
| AMNH A167564               | F  | 46.8 | 3.5 | 5.0 | 3.8 | 2.6 | 2.8 | 4.3 | 16.7 | 21.6 | 14.7 | 8.4  | 23.6 | 24.0 | 25.3 | 10.5 | 8.8 | 3.0 | 9.2 | 1.7 | 6.8 | 7.8 |
| AMNH A167569               | F  | 46.5 | 3.2 | 5.8 | 3.6 | 2.7 | 3.0 | 4.3 | 15.8 | 20.2 | 14.0 | 7.7  | 23.7 | 23.0 | 23.7 | 9.6  | 8.5 | 3.0 | 7.8 | 1.5 | 6.3 | 6.5 |
| AMNH A167570               | F  | 46.4 | 3.2 | 5.6 | 3.8 | 2.8 | 2.1 | 3.0 | 15.7 | 19.3 | 14.1 | 8.1  | 23.6 | 24.1 | 23.9 | 11.0 | 8.0 | 3.0 | 7.2 | 1.8 | 6.2 | 7.0 |
| AMNH A167576               | F  | 50.6 | 3.4 | 6.1 | 3.8 | 2.6 | 2.6 | 3.5 | 16.2 | 22.3 | 14.1 | 9.1  | 25.1 | 24.0 | 23.7 | 10.7 | 8.3 | 3.2 | 8.5 | 2.1 | 6.0 | 6.3 |
| UADBA 8231                 | F  | 47.6 | 3.3 | 6.3 | 3.8 | 2.5 | 2.4 | 3.9 | 15.8 | 19.0 | 14.4 | 12.4 | 24.3 | 24.0 | 23.6 | 12.0 | 8.3 | 2.7 | 7.3 | 1.8 | 5.9 | 7.1 |
| AMNH A167596 <sup>*b</sup> | SA | 40.7 | -   | -   | -   | -   | -   | -   | -    | -    | -    | -    | -    | -    | -    | -    | -   | -   | -   | -   | -   | -   |
| UADBA 8375                 | F  | 46.6 | 3.9 | 5.8 | 4.3 | 2.7 | 2.3 | 4.5 | 15.8 | 19.4 | 15.2 | 10.4 | 27.4 | 26.7 | 25.0 | 11.2 | 8.0 | 2.5 | 6.5 | 1.8 | 5.7 | 6.5 |
| UADBA 8381                 | F  | 48.6 | 4.4 | 7.4 | 5.0 | 2.2 | 1.7 | 4.6 | 16.7 | 19.1 | 14.0 | 9.8  | 25.4 | 25.0 | 22.4 | 9.7  | 6.7 | 2.3 | 5.8 | 1.8 | 4.7 | 5.9 |
| UADBA 8383                 | F  | 49.3 | 3.8 | 6.8 | 4.5 | 3.0 | 3.2 | 4.9 | 17.3 | 20.5 | 14.5 | 10.0 | 25.3 | 25.0 | 23.1 | 12.5 | 8.2 | 3.0 | 6.7 | 2.3 | 6.1 | 7.1 |
| UADBA 8384                 | F  | 48.0 | 4.0 | 6.0 | 4.3 | 2.7 | 3.1 | 5.2 | 16.3 | 20.2 | 15.9 | 9.4  | 25.4 | 23.0 | 24.7 | 9.3  | 8.6 | 2.9 | 7.4 | 2.0 | 5.8 | 6.7 |
| UADBA 8388                 | F  | 49.4 | 3.6 | 6.7 | 4.7 | 2.6 | 3.3 | 4.8 | 17.1 | 20.3 | 15.3 | 10.0 | 27.5 | 24.2 | 25.8 | 9.2  | 8.5 | 2.6 | 7.0 | 2.1 | 5.8 | 7.6 |
| AMNH A167517               | M  | 34.5 | 4.3 | 6.3 | 2.8 | 1.9 | 2.1 | 3.1 | 12.3 | 15.7 | 11.5 | 5.5  | 17.9 | 16.8 | 18.6 | 8.4  | 6.3 | 2.4 | 5.7 | 1.3 | 4.8 | 5.4 |
| AMNH A167528               | M  | 42.8 | 4.6 | 5.0 | 2.9 | 2.4 | 2.9 | 3.5 | 12.8 | 20.0 | 12.4 | 6.8  | 21.4 | 20.4 | 20.6 | 9.6  | 7.5 | 3.0 | 6.2 | 1.7 | 5.0 | 6.1 |
| AMNH A167555               | M  | 35.8 | 4.4 | 5.5 | 2.4 | 2.1 | 2.3 | 3.0 | 12.0 | 16.6 | 10.4 | 6.6  | 18.5 | 17.4 | 17.6 | 7.1  | 5.6 | 2.2 | 5.3 | 1.2 | 4.3 | 4.9 |
| AMNH A167557               | M  | 38.4 | 4.4 | 4.7 | 3.0 | 2.4 | 2.6 | 3.4 | 13.2 | 18.4 | 11.6 | 6.4  | 18.7 | 18.6 | 20.0 | 8.7  | 6.6 | 2.3 | 5.7 | 2.2 | 5.1 | 5.4 |
| AMNH A167560               | M  | 36.0 | 4.4 | 4.7 | 3.1 | 2.2 | 2.1 | 3.0 | 12.2 | 17.6 | 12.4 | 6.5  | 20.1 | 18.1 | 20.1 | 8.7  | 6.0 | 2.6 | 5.6 | 1.5 | 5.1 | 5.4 |
| AMNH A167567               | M  | 34.0 | 3.5 | 4.2 | 2.6 | 2.0 | 2.0 | 2.6 | 11.3 | 15.8 | 10.1 | 6.1  | 18.8 | 17.7 | 17.3 | 7.8  | 5.8 | 2.1 | 5.1 | 1.1 | 3.8 | 4.7 |
| AMNH A167568               | M  | 36.4 | 5.2 | 5.1 | 2.4 | 2.1 | 2.2 | 2.8 | 12.6 | 17.9 | 12.1 | 6.4  | 18.9 | 17.1 | 18.8 | 7.2  | 6.1 | 2.1 | 6.2 | 1.0 | 4.1 | 5.1 |
| AMNH A167571               | M  | 38.3 | 5.3 | 4.1 | 3.1 | 2.5 | 2.6 | 3.3 | 11.8 | 18.4 | 11.1 | 7.3  | 19.7 | 18.8 | 19.3 | 7.5  | 6.2 | 2.4 | 5.9 | 1.4 | 4.5 | 4.6 |
| AMNH A167572               | M  | 38.0 | 5.0 | 4.3 | 3.0 | 2.0 | 2.3 | 3.3 | 12.5 | 17.0 | 12.2 | 7.4  | 19.6 | 18.3 | 19.0 | 8.5  | 6.2 | 2.4 | 5.9 | 1.4 | 5.1 | 5.5 |
| AMNH A167573               | M  | 38.2 | 4.6 | 5.0 | 2.8 | 1.9 | 2.1 | 3.5 | 12.1 | 18.6 | 11.1 | 6.4  | 19.8 | 18.3 | 17.6 | 7.6  | 6.5 | 2.3 | 5.8 | 1.2 | 4.4 | 5.7 |
| AMNH A167574               | M  | 36.3 | 4.6 | 4.6 | 2.5 | 2.1 | 2.5 | 3.1 | 11.4 | 17.6 | 11.0 | 7.1  | 19.4 | 17.8 | 18.5 | 8.1  | 6.1 | 2.2 | 6.1 | 1.4 | 4.4 | 5.2 |
| UADBA 8387                 | M  | 35.6 | 4.8 | 5.0 | 3.8 | 1.8 | 2.4 | 3.3 | 12.8 | 16.0 | 11.1 | 6.1  | 17.0 | 18.7 | 18.7 | 8.9  | 6.1 | 1.8 | 5.3 | 1.1 | 4.8 | 5.7 |
| UADBA 8389                 | M  | 38.8 | 5.6 | 6.1 | 4.0 | 1.8 | 2.5 | 4.0 | 13.9 | 17.5 | 11.8 | 7.3  | 18.2 | 18.3 | 18.8 | 7.7  | 6.7 | 2.4 | 5.8 | 2.0 | 4.8 | 5.7 |
| UADBA 8390                 | M  | 39.6 | 5.6 | 5.4 | 3.7 | 1.8 | 2.5 | 4.9 | 14.4 | 17.8 | 12.0 | 7.5  | 19.5 | 17.6 | 20.6 | 8.1  | 7.4 | 2.4 | 6.0 | 1.7 | 4.6 | 5.8 |
| UADBA 8392                 | M  | 33.6 | 3.4 | 4.5 | 2.8 | 2.0 | 2.3 | 3.1 | 11.5 | 14.2 | 10.4 | 6.6  | 17.4 | 16.0 | 16.4 | 8.1  | 5.7 | 2.1 | 4.7 | 1.5 | 4.4 | 4.8 |
| UADBA 8404                 | M  | 38.3 | 5.4 | 5.1 | 4.2 | 1.8 | 2.7 | 3.3 | 13.4 | 18.3 | 11.0 | 7.6  | 16.5 | 17.3 | 17.8 | 9.0  | 7.2 | 2.1 | 5.4 | 1.6 | 4.0 | 4.9 |

|                           |   |      |     |     |     |     |     |     |      |      |      |     |      |      |      |     |     |     |     |     |     |     |
|---------------------------|---|------|-----|-----|-----|-----|-----|-----|------|------|------|-----|------|------|------|-----|-----|-----|-----|-----|-----|-----|
| UADBA 8407                | M | 35.6 | 4.5 | 5.0 | 2.9 | 1.7 | 2.8 | 3.4 | 13.5 | 16.1 | 11.4 | 7.7 | 20.2 | 19.8 | 19.4 | 9.1 | 6.7 | 2.1 | 5.3 | 1.5 | 4.8 | 5.6 |
| <sup>b</sup> ID Molecular |   |      |     |     |     |     |     |     |      |      |      |     |      |      |      |     |     |     |     |     |     |     |
| * Holotype                |   |      |     |     |     |     |     |     |      |      |      |     |      |      |      |     |     |     |     |     |     |     |

**Table S12.** Measurement data for *Mantidactylus tavaratra* n. sp.. All measurements in mm. F: female, M: male, J: juvenile, SA: subadult

| Specimen                  | Sexes | SVL  | TD  | ED  | EN  | EST | NS  | NN  | HW   | HL   | HDL  | RC   | FE   | TI   | FT   | TA   | EO   | EM  | EHEAD | T1  | TO3 | TO5  |
|---------------------------|-------|------|-----|-----|-----|-----|-----|-----|------|------|------|------|------|------|------|------|------|-----|-------|-----|-----|------|
| AMNH A167507              | F     | 52.0 | 3.5 | 6.1 | 3.8 | 3.0 | 3.1 | 4.6 | 17.9 | 22.6 | 15.8 | 9.8  | 28.0 | 27.8 | 27.0 | 13.0 | 5.9  | 3.6 | 7.5   | 2.9 | 6.8 | 7.5  |
| AMNH A167508              | F     | 55.6 | 4.0 | 6.5 | 4.2 | 2.8 | 3.2 | 5.1 | 19.0 | 24.0 | 15.6 | 10.2 | 27.5 | 26.5 | 25.9 | 12.6 | 10.0 | 3.5 | 8.0   | 1.8 | 6.3 | 7.0  |
| AMNH A167510 <sup>b</sup> | F     | 54.9 | 3.9 | 6.6 | 4.3 | 2.4 | 3.2 | 4.5 | 17.5 | 23.5 | 16.8 | 9.5  | 28.5 | 28.0 | 28.1 | 11.1 | 9.0  | 3.5 | 7.4   | 2.3 | 6.9 | 7.6  |
| AMNH A167512              | F     | 48.0 | 3.7 | 5.7 | 3.8 | 2.2 | 2.6 | 4.6 | 17.3 | 21.5 | 15.3 | 8.8  | 26.9 | 26.6 | 26.1 | 11.4 | 8.7  | 3.1 | 6.2   | 2.0 | 7.0 | 8.1  |
| AMNH A167518              | F     | 44.8 | 3.8 | 4.7 | 3.1 | 2.2 | 2.6 | 5.2 | 15.3 | 19.6 | 13.1 | 7.5  | 23.8 | 23.1 | 23.2 | 11.0 | 7.8  | 3.6 | 6.1   | 2.2 | 5.5 | 5.8  |
| AMNH A167519              | F     | 58.6 | 4.1 | 6.4 | 4.0 | 3.0 | 3.8 | 4.8 | 20.3 | 24.6 | 16.4 | 9.2  | 28.8 | 27.9 | 29.1 | 12.2 | 10.2 | 3.2 | 9.5   | 2.2 | 6.8 | 7.8  |
| AMNH A167526              | F     | 54.7 | 3.2 | 6.7 | 3.9 | 2.7 | 3.0 | 4.6 | 18.1 | 23.0 | 13.4 | 8.3  | 25.1 | 26.1 | 23.1 | 11.1 | 9.2  | 2.5 | 8.4   | 2.2 | 5.9 | 7.4  |
| AMNH A167529              | F     | 54.2 | 3.1 | 7.1 | 4.0 | 2.8 | 3.2 | 5.0 | 19.0 | 24.0 | 16.1 | 9.2  | 28.3 | 27.7 | 28.0 | 11.5 | 9.6  | 3.6 | 8.3   | 2.0 | 6.6 | 7.3  |
| AMNH A167533              | F     | 53.6 | 3.9 | 6.0 | 3.9 | 1.8 | 2.3 | 4.2 | 18.6 | 18.6 | 16.4 | 10.6 | 30.0 | 29.7 | 29.4 | 12.9 | 9.3  | 3.4 | 7.2   | 2.7 | 8.0 | 8.8  |
| UADBA8117                 | F     | 61.0 | 4.0 | 7.7 | 4.4 | 2.8 | 3.6 | 5.9 | 21.3 | 26.1 | 18.4 | 12.0 | 34.3 | 31.7 | 33.4 | 13.7 | 10.8 | 3.5 | 8.8   | 2.9 | 9.9 | 10.6 |
| UADBA8120                 | F     | 63.3 | 5.0 | 7.8 | 5.4 | 3.0 | 4.1 | 6.6 | 23.5 | 28.2 | 17.3 | 12.3 | 33.2 | 33.6 | 34.3 | 14.6 | 11.5 | 3.3 | 10.0  | 2.6 | 9.5 | 9.9  |
| UADBA12155                | F     | 59.2 | 4.8 | 6.6 | 4.7 | 2.2 | 2.4 | 4.7 | 19.0 | 25.3 | 16.0 | 9.8  | 27.3 | 26.3 | 27.8 | 11.7 | 10.1 | 3.4 | 7.8   | 2.2 | 7.0 | 7.8  |
| UADBA12156                | F     | 56.6 | 4.3 | 6.4 | 4.7 | 2.1 | 2.8 | 5.0 | 18.3 | 24.4 | 16.2 | 10.6 | 28.7 | 26.8 | 28.8 | 12.3 | 9.4  | 3.3 | 7.5   | 1.8 | 7.8 | 8.9  |
| UADBA19619                | F     | 54.1 | 3.8 | 6.7 | 4.1 | 2.8 | 3.2 | 4.7 | 18.7 | 24.2 | 14.6 | 9.5  | 27.8 | 27.4 | 27.3 | 12.5 | 8.8  | 3.2 | 8.3   | 2.4 | 6.6 | 7.4  |
| UADBA19621                | F     | 55.9 | 4.2 | 6.6 | 4.2 | 1.6 | 1.9 | 4.9 | 18.6 | 22.8 | 16.0 | 9.1  | 25.4 | 25.5 | 25.1 | 12.6 | 9.0  | 3.1 | 9.3   | 2.4 | 7.3 | 7.9  |
| UADBA19622                | F     | 56.3 | 4.3 | 7.4 | 4.1 | 2.7 | 2.3 | 4.9 | 18.0 | 23.7 | 15.5 | 9.6  | 27.2 | 26.7 | 26.9 | 12.4 | 9.0  | 3.4 | 8.0   | 2.0 | 7.2 | 8.3  |
| UADBA19623                | F     | 42.7 | 3.0 | 5.2 | 3.2 | 1.6 | 2.8 | 3.9 | 15.4 | 18.1 | 13.8 | 8.1  | 24.5 | 24.0 | 23.3 | 10.0 | 6.4  | 2.5 | 6.2   | 2.2 | 5.8 | 6.1  |
| UADBA19624                | F     | 51.9 | 3.3 | 5.9 | 3.7 | 2.3 | 2.7 | 4.8 | 17.5 | 22.4 | 15.1 | 9.0  | 26.6 | 27.4 | 26.7 | 11.7 | 8.0  | 3.1 | 7.6   | 2.2 | 6.8 | 7.7  |
| UADBA19628                | F     | 57.1 | 4.3 | 6.7 | 4.9 | 2.4 | 2.8 | 4.8 | 19.8 | 25.5 | 17.1 | 10.0 | 28.7 | 28.7 | 29.3 | 12.7 | 9.3  | 3.4 | 8.3   | 2.6 | 7.6 | 8.6  |
| UADBA19629                | F     | 53.8 | 3.9 | 5.9 | 4.2 | 2.9 | 2.1 | 4.7 | 19.8 | 23.2 | 16.3 | 9.2  | 27.2 | 27.4 | 27.5 | 12.9 | 8.4  | 3.2 | 7.1   | 2.1 | 6.7 | 8.5  |
| UADBA19633                | F     | 53.6 | 3.6 | 6.3 | 4.5 | 2.4 | 3.3 | 4.3 | 17.9 | 22.6 | 15.1 | 9.5  | 27.1 | 27.4 | 25.8 | 12.3 | 8.8  | 3.1 | 7.9   | 2.2 | 7.0 | 8.3  |
| UADBA19634                | F     | 56.2 | 3.8 | 6.6 | 4.2 | 2.6 | 3.1 | 4.9 | 18.4 | 24.8 | 15.5 | 9.6  | 28.0 | 27.3 | 26.5 | 11.8 | 9.1  | 3.4 | 8.4   | 2.3 | 6.7 | 8.3  |
| UADBA19636                | F     | 55.1 | 4.2 | 6.6 | 4.5 | 2.6 | 3.7 | 5.4 | 19.4 | 23.6 | 15.6 | 9.0  | 26.7 | 26.5 | 26.4 | 11.7 | 9.7  | 3.2 | 8.0   | 2.4 | 7.2 | 7.7  |
| UADBA19637                | F     | 57.7 | 4.5 | 7.1 | 4.3 | 2.6 | 3.0 | 5.1 | 19.2 | 24.8 | 16.6 | 9.2  | 28.4 | 28.0 | 28.2 | 12.4 | 9.7  | 3.4 | 8.5   | 2.6 | 7.9 | 8.0  |
| UADBA19638                | F     | 49.3 | 3.2 | 5.6 | 4.3 | 2.5 | 2.8 | 4.9 | 17.3 | 21.8 | 14.4 | 8.8  | 26.1 | 26.6 | 25.1 | 11.0 | 8.2  | 2.9 | 6.6   | 2.4 | 7.1 | 7.7  |
| UADBA19639                | F     | 57.6 | 4.0 | 6.4 | 3.8 | 2.2 | 3.4 | 5.3 | 19.2 | 25.2 | 17.0 | 8.8  | 26.7 | 27.8 | 26.1 | 12.4 | 8.9  | 3.6 | 9.2   | 2.5 | 7.3 | 8.4  |
| UADBA 19650               | F     | 54.0 | 3.0 | 6.6 | 4.3 | 2.1 | 1.9 | 4.5 | 17.6 | 22.0 | 14.8 | 10.7 | 27.8 | 27.5 | 26.0 | 11.6 | 9.9  | 3.4 | 8.2   | 2.5 | 7.2 | 7.8  |

|             |   |      |     |     |     |     |     |     |      |      |      |      |      |      |      |      |      |     |     |     |     |     |
|-------------|---|------|-----|-----|-----|-----|-----|-----|------|------|------|------|------|------|------|------|------|-----|-----|-----|-----|-----|
| UADBA26108  | F | 58.3 | 3.7 | 5.6 | 4.3 | 3.0 | 3.0 | 4.6 | 19.6 | 24.8 | 15.2 | 10.0 | 25.2 | 27.3 | 26.7 | 11.6 | 10.3 | 3.0 | 8.7 | 2.6 | 7.1 | 8.0 |
| UADBA26109  | F | 53.5 | 3.7 | 7.1 | 4.3 | 2.7 | 4.0 | 5.4 | 18.2 | 21.7 | 17.1 | 9.8  | 26.4 | 26.5 | 26.5 | 12.1 | 8.7  | 3.3 | 8.2 | 1.8 | 6.0 | 6.8 |
| UADBA26110  | F | 55.4 | 3.8 | 6.5 | 4.6 | 2.6 | 3.0 | 6.0 | 18.8 | 23.8 | 16.6 | 10.0 | 28.3 | 29.0 | 27.4 | 13.8 | 8.9  | 3.1 | 7.5 | 2.4 | 6.5 | 8.0 |
| UADBA26310  | F | 51.9 | 4.0 | 6.5 | 4.7 | 2.4 | 3.6 | 5.9 | 20.0 | 24.7 | 18.3 | 10.6 | 28.7 | 29.0 | 30.5 | 12.8 | 8.5  | 3.5 | 8.0 | 2.3 | 7.5 | 8.7 |
| UADBA26311  | F | 52.6 | 4.2 | 6.7 | 3.4 | 2.4 | 3.4 | 4.9 | 18.2 | 23.3 | 12.1 | 9.6  | 28.4 | 27.0 | 28.7 | 12.0 | 8.6  | 3.1 | 8.6 | 2.5 | 7.4 | 8.3 |
| UADBA26312  | F | 56.2 | 4.7 | 7.6 | 4.7 | 2.2 | 4.4 | 5.9 | 20.6 | 23.0 | 17.0 | 9.9  | 28.2 | 27.5 | 27.2 | 12.1 | 9.1  | 3.6 | 9.0 | 2.5 | 5.9 | 6.5 |
| UADBA26313  | F | 52.8 | 3.8 | 6.1 | 4.3 | 2.7 | 3.4 | 4.8 | 18.3 | 24.3 | 16.7 | 9.7  | 29.0 | 28.4 | 27.7 | 12.9 | 8.6  | 3.1 | 8.4 | 2.4 | 6.8 | 7.2 |
| UADBA26314  | F | 48.4 | 3.7 | 6.0 | 4.4 | 2.4 | 3.5 | 5.0 | 16.6 | 22.2 | 15.7 | 8.8  | 26.9 | 28.2 | 26.0 | 13.0 | 7.8  | 3.0 | 6.8 | 2.2 | 6.6 | 7.2 |
| UADBA26315  | F | 61.4 | 4.4 | 7.7 | 4.7 | 2.4 | 3.5 | 5.0 | 20.2 | 24.7 | 17.6 | 8.7  | 30.7 | 30.1 | 28.4 | 13.0 | 9.6  | 3.4 | 8.8 | 2.4 | 6.4 | 7.1 |
| UADBA26316  | F | 61.4 | 4.3 | 7.4 | 4.7 | 2.2 | 3.8 | 6.6 | 19.7 | 26.6 | 17.2 | 10.3 | 27.0 | 28.2 | 27.0 | 11.7 | 10.1 | 4.0 | 8.9 | 2.2 | 6.1 | 7.4 |
| UADBA26317  | F | 52.6 | 3.8 | 6.6 | 4.9 | 2.7 | 3.1 | 4.8 | 18.0 | 22.6 | 15.2 | 9.7  | 28.0 | 28.6 | 26.6 | 12.1 | 8.5  | 3.4 | 8.2 | 2.1 | 6.6 | 7.7 |
| UADBA26318  | F | 49.1 | 3.4 | 5.7 | 4.2 | 2.4 | 3.5 | 4.7 | 16.4 | 21.4 | 16.6 | 9.0  | 27.4 | 28.4 | 27.6 | 12.5 | 9.3  | 3.6 | 8.0 | 2.5 | 7.5 | 8.2 |
| UADBA26319  | F | 57.6 | 4.2 | 6.4 | 5.1 | 2.1 | 3.4 | 4.8 | 18.5 | 24.8 | 15.7 | 9.3  | 27.1 | 27.3 | 27.8 | 13.2 | 9.6  | 3.1 | 8.1 | 2.3 | 6.7 | 7.9 |
| UADBA26320  | F | 52.1 | 3.9 | 6.6 | 4.4 | 3.0 | 3.1 | 5.5 | 18.0 | 23.5 | 15.8 | 8.7  | 26.1 | 25.5 | 26.4 | 12.2 | 8.6  | 3.2 | 9.0 | 2.1 | 6.6 | 6.9 |
| UADBA26321  | F | 57.6 | 4.3 | 6.6 | 4.8 | 2.4 | 2.5 | 5.4 | 18.5 | 23.6 | 15.7 | 10.4 | 28.6 | 28.1 | 28.0 | 14.0 | 9.4  | 3.6 | 7.4 | 2.5 | 7.3 | 7.8 |
| UADBA26322  | F | 56.7 | 4.3 | 6.0 | 4.4 | 2.7 | 2.8 | 4.7 | 19.7 | 25.5 | 16.5 | 9.1  | 26.8 | 27.9 | 28.4 | 12.4 | 9.2  | 3.2 | 8.6 | 2.0 | 7.5 | 8.5 |
| UADBA26323  | F | 56.0 | 4.2 | 6.7 | 4.8 | 2.5 | 3.5 | 4.8 | 18.6 | 23.6 | 17.1 | 9.0  | 29.2 | 27.4 | 29.1 | 12.3 | 9.4  | 3.0 | 8.6 | 2.5 | 7.6 | 8.1 |
| UADBA26324  | F | 53.8 | 3.8 | 6.5 | 4.1 | 3.1 | 3.1 | 5.4 | 18.4 | 22.3 | 16.8 | 9.7  | 28.7 | 28.4 | 28.5 | 13.4 | 9.1  | 3.5 | 7.8 | 2.1 | 7.5 | 8.4 |
| UADBA26325  | F | 60.6 | 4.2 | 6.6 | 4.6 | 2.6 | 3.3 | 6.3 | 20.6 | 25.6 | 17.6 | 11.0 | 31.6 | 30.6 | 29.8 | 13.5 | 9.3  | 3.2 | 9.1 | 2.5 | 7.3 | 8.2 |
| UADBA26326  | F | 52.4 | 3.1 | 5.4 | 3.2 | 2.6 | 2.4 | 3.6 | 18.0 | 23.3 | 14.4 | 8.3  | 25.1 | 25.2 | 24.4 | 11.4 | 7.9  | 2.9 | 7.6 | 1.7 | 6.8 | 7.0 |
| UADBA26328  | F | 58.4 | 4.0 | 7.2 | 5.0 | 2.7 | 4.0 | 5.0 | 20.0 | 24.2 | 17.1 | 11.7 | 30.4 | 30.0 | 29.2 | 13.2 | 9.5  | 3.6 | 8.6 | 2.8 | 7.1 | 7.5 |
| UADBA26330  | F | 56.7 | 4.5 | 7.0 | 4.9 | 1.4 | 3.3 | 5.4 | 19.0 | 24.4 | 17.5 | 9.7  | 29.5 | 30.4 | 29.0 | 14.6 | 8.9  | 3.3 | 7.4 | 2.1 | 7.2 | 8.1 |
| UADBA26331  | F | 58.1 | 4.0 | 7.7 | 4.4 | 2.5 | 4.0 | 6.5 | 19.4 | 24.8 | 18.2 | 10.0 | 27.1 | 30.0 | 28.0 | 14.0 | 9.9  | 3.4 | 8.9 | 2.6 | 7.2 | 7.9 |
| UADBA26332  | F | 53.0 | 3.1 | 5.2 | 4.3 | 2.1 | 3.1 | 4.3 | 17.5 | 22.8 | 14.3 | 8.7  | 26.8 | 27.0 | 26.1 | 12.0 | 9.0  | 3.1 | 7.9 | 2.1 | 6.8 | 8.2 |
| UADBA26334  | F | 49.4 | 3.8 | 6.6 | 4.2 | 2.1 | 3.4 | 4.6 | 17.6 | 22.8 | 15.2 | 8.6  | 27.1 | 27.8 | 25.3 | 11.3 | 8.8  | 3.3 | 7.7 | 2.4 | 5.9 | 8.1 |
| UADBA26335  | F | 50.5 | 3.2 | 5.8 | 4.2 | 2.3 | 2.1 | 4.6 | 17.6 | 21.0 | 10.8 | 7.8  | 24.0 | 26.0 | 26.5 | 10.9 | 8.1  | 2.9 | 7.4 | 2.2 | 6.7 | 7.9 |
| UADBA26336  | F | 56.1 | 3.9 | 6.3 | 4.3 | 2.8 | 4.0 | 5.0 | 19.5 | 20.7 | 15.2 | 9.5  | 28.3 | 27.5 | 25.6 | 12.6 | 8.6  | 3.3 | 7.7 | 2.4 | 6.2 | 7.8 |
| UADBA26338  | F | 53.8 | 4.4 | 6.1 | 4.0 | 2.3 | 3.1 | 5.6 | 17.3 | 24.0 | 16.4 | 8.7  | 26.7 | 27.2 | 28.0 | 13.3 | 6.5  | 2.5 | 6.3 | 1.7 | 6.6 | 7.5 |
| UADBA26340  | F | 57.6 | 4.4 | 7.7 | 4.4 | 2.7 | 3.4 | 5.1 | 19.3 | 25.2 | 17.6 | 10.0 | 29.0 | 28.2 | 28.5 | 13.2 | 8.6  | 3.1 | 7.8 | 2.1 | 7.7 | 8.6 |
| UADBA26341  | F | 50.0 | 3.9 | 6.2 | 4.3 | 2.4 | 3.6 | 5.8 | 18.3 | 22.6 | 15.3 | 9.4  | 29.6 | 27.8 | 26.8 | 12.0 | 8.9  | 3.4 | 8.0 | 2.2 | 6.8 | 7.2 |
| UADBA26393  | F | 53.8 | 2.6 | 6.0 | 3.5 | 2.0 | 2.5 | 4.3 | 18.0 | 22.6 | 14.8 | 8.4  | 27.3 | 26.3 | 26.0 | 11.6 | 9.0  | 3.3 | 9.3 | 2.2 | 6.5 | 7.9 |
| UADBA26394  | F | 57.7 | 3.3 | 6.2 | 4.5 | 2.5 | 3.1 | 4.6 | 19.0 | 22.7 | 16.4 | 8.8  | 29.4 | 28.4 | 28.6 | 12.5 | 9.6  | 2.6 | 8.8 | 2.5 | 7.2 | 8.3 |
| UMMZ 212833 | F | 53.7 | 4.0 | 6.9 | 4.0 | 0.8 | 2.0 | 4.1 | 19.2 | 21.0 | 14.7 | 9.9  | 27.0 | 26.3 | 25.3 | 12.1 | 10.2 | 4.3 | 8.4 | 2.8 | 5.7 | 6.7 |

|                           |   |      |     |     |     |     |     |     |      |      |      |     |      |      |      |      |     |     |     |     |     |     |
|---------------------------|---|------|-----|-----|-----|-----|-----|-----|------|------|------|-----|------|------|------|------|-----|-----|-----|-----|-----|-----|
| AMNH A167513              | F | 47.5 | 3.2 | 5.6 | 3.8 | 1.9 | 2.5 | 3.7 | 15.7 | 19.5 | 14.2 | 8.3 | 25.7 | 26.0 | 25.4 | 11.3 | 8.0 | 2.8 | 6.5 | 1.4 | 5.8 | 6.5 |
| AMNH A167515 <sup>b</sup> | M | 45.3 | 4.5 | 5.0 | 3.5 | 2.2 | 2.4 | 4.2 | 15.3 | 21.4 | 14.4 | 7.5 | 23.3 | 22.5 | 23.3 | 10.4 | 8.1 | 3.5 | 7.6 | 1.8 | 4.9 | 6.7 |
| AMNH A167520              | M | 48.8 | 4.7 | 5.4 | 3.7 | 2.3 | 2.4 | 3.9 | 15.8 | 21.6 | 15.6 | 7.7 | 24.4 | 24.4 | 25.1 | 12.4 | 8.4 | 3.2 | 7.1 | 2.1 | 5.4 | 6.8 |
| AMNH A167524 <sup>b</sup> | M | 41.1 | 4.6 | 5.2 | 3.1 | 2.1 | 2.3 | 4.0 | 12.0 | 19.5 | 12.6 | 6.8 | 21.2 | 20.3 | 21.2 | 9.0  | 7.5 | 2.6 | 6.5 | 2.2 | 5.2 | 5.8 |
| AMNH A167531              | M | 38.6 | 3.1 | 4.2 | 2.7 | 1.5 | 2.2 | 3.4 | 12.9 | 17.3 | 11.6 | 7.1 | 21.4 | 19.9 | 19.6 | 9.2  | 6.5 | 2.5 | 5.3 | 1.7 | 4.6 | 5.3 |
| AMNH A167532              | M | 37.0 | 3.0 | 4.9 | 2.7 | 1.5 | 2.7 | 3.4 | 12.4 | 16.4 | 10.8 | 6.2 | 21.6 | 20.2 | 19.8 | 8.7  | 6.2 | 2.2 | 4.5 | 1.2 | 4.7 | 5.1 |
| UADBA 19625               | M | 39.9 | 4.5 | 4.8 | 3.6 | 1.8 | 2.3 | 3.3 | 13.9 | 19.4 | 11.7 | 7.1 | 18.7 | 19.3 | 20.1 | 9.4  | 6.4 | 2.2 | 5.7 | 1.5 | 5.0 | 5.1 |
| UADBA 19630               | M | 43.3 | 5.3 | 5.3 | 3.5 | 1.8 | 1.7 | 4.0 | 15.4 | 19.4 | 12.7 | 7.4 | 21.2 | 21.4 | 21.2 | 10.0 | 8.1 | 2.8 | 7.4 | 2.1 | 7.2 | 7.8 |
| UADBA 19644               | M | 35.7 | 5.1 | 4.6 | 4.5 | 1.7 | 2.1 | 3.5 | 11.6 | 16.2 | 11.9 | 7.0 | 18.7 | 18.6 | 20.2 | 8.2  | 6.0 | 1.8 | 5.4 | 2.0 | 4.5 | 5.0 |
| UADBA 26306               | M | 38.5 | 4.0 | 4.9 | 3.6 | 1.7 | 2.8 | 4.2 | 13.7 | 17.6 | 13.2 | 7.6 | 20.3 | 21.7 | 21.4 | 10.8 | 6.3 | 2.0 | 5.3 | 1.6 | 5.0 | 5.1 |
| UADBA 26308               | M | 43.6 | 5.1 | 6.0 | 4.1 | 2.0 | 2.6 | 4.3 | 15.1 | 19.5 | 13.7 | 7.5 | 22.1 | 22.8 | 22.7 | 9.8  | 7.0 | 2.6 | 6.2 | 2.1 | 5.8 | 6.2 |
| UADBA 26309               | M | 44.4 | 5.2 | 5.2 | 4.2 | 2.4 | 3.2 | 4.4 | 15.4 | 20.5 | 14.6 | 8.1 | 22.6 | 22.1 | 23.5 | 10.2 | 6.6 | 2.4 | 6.0 | 1.6 | 5.3 | 5.4 |

<sup>b</sup>ID Molecular

\* Holotype
